1  
2  
3  
4  
5  
6  
7  
8  
9  
10  
11  
12  
13  
14  
15  
16  
17  
18  
19  
20  
21

## **Mitotic CDK promotes replisome disassembly, fork breakage, and complex DNA rearrangements**

Lin Deng<sup>1,2,3</sup>, R. Alex. Wu<sup>3</sup>, Olga V. Kochenova<sup>3</sup>, David Pellman<sup>1,2,4,5,6</sup>, and Johannes C. Walter<sup>3,5,6</sup>

<sup>1</sup>Department of Pediatric Oncology, Dana-Farber Cancer Institute, Boston, MA 02215, USA

<sup>2</sup>Department of Cell Biology, Harvard Medical School, Boston, MA 02115, USA

<sup>3</sup>Department of Biological Chemistry and Molecular Pharmacology, Harvard Medical School, Boston, MA 02115, USA

<sup>4</sup>Broad Institute of MIT and Harvard, Cambridge, MA 02142, USA

<sup>5</sup>Howard Hughes Medical Institute, Boston, MA 02115, USA

<sup>6</sup>These authors contributed equally to this work

\*Correspondence: [David\\_Pellman@dfci.harvard.edu](mailto:David_Pellman@dfci.harvard.edu) (D.P.),  
[Johannes\\_Walter@hms.harvard.edu](mailto:Johannes_Walter@hms.harvard.edu) (J.C.W.)

22 **SUMMARY**

23 DNA replication errors generate complex chromosomal rearrangements and thereby  
24 contribute to tumorigenesis and other human diseases. Although the events that trigger  
25 these errors are not well understood, one candidate is mitotic entry before the  
26 completion of DNA replication. To address the impact of mitosis on DNA replication, we  
27 employed *Xenopus* egg extracts. When mitotic CDK (Cyclin B1-CDK1) is used to drive  
28 these extracts into mitosis, the E3 ubiquitin ligase TRAIP promotes ubiquitylation of the  
29 replicative CMG (CDC45/MCM2-7/GINS) helicase at stalled forks and at forks that have  
30 completed DNA synthesis. In both cases, ubiquitylation is followed by CMG extraction  
31 from chromatin by the CDC48/p97 ATPase. At stalled forks, CMG removal results in  
32 fork breakage and complex end joining events involving deletions and template-  
33 switching. Our results identify TRAIP-dependent replisome disassembly as a novel  
34 trigger of replication fork collapse and propose it underlies complex DNA  
35 rearrangements in mitosis.

36 **HIGHLIGHTS**

37 1. TRAIP-dependent MCM7 ubiquitylation removes all CMGs from chromatin in  
38 mitosis

39 2. CMG unloading from stalled forks causes replication fork breakage

40 3. Replication fork breakage in mitosis causes complex rearrangements

41 4. New model of replication fork collapse

42

## 43 INTRODUCTION

44 Genome evolution occurs through the gradual accrual of genetic changes or in a  
45 saltatory manner, with bursts of chromosomal alterations originating from single  
46 catastrophic events (Holland and Cleveland, 2012; Leibowitz et al., 2015; Liu et al.,  
47 2011; Stephens et al., 2011). Many chromosomal alterations can be traced to DNA  
48 breaks that arise during DNA replication (Hills and Diffley, 2014; Mankouri et al., 2013;  
49 Techer et al., 2017). However, there is an ongoing debate about when and how  
50 replication fork breakage is triggered (Toledo et al., 2017).

51 In normal cells, multiple cell cycle regulatory controls and error correction  
52 mechanisms prevent DNA replication errors (Hills and Diffley, 2014). Cells prepare for  
53 DNA replication in the G1 phase of the cell cycle, when pairs of MCM2-7 ATPases are  
54 recruited to each origin (“licensing”). In S phase, cyclin-dependent kinase (CDK)  
55 promotes the association of CDC45 and GINS with MCM2-7, leading to formation of the  
56 replicative CMG helicase complex (CDC45-MCM2-7-GINS) (“initiation”). CMG  
57 unwinding of the origin nucleates the assembly of two DNA replication forks that travel  
58 away from the origin, copying DNA as they go (“elongation”). When converging forks  
59 from adjacent origins meet, the replisome is disassembled (“termination”). Replisome  
60 disassembly in S phase requires the E3 ubiquitin ligase CRL2<sup>Lrr1</sup>, which ubiquitylates  
61 the MCM7 subunit of CMG, leading to CMG’s extraction from chromatin by the p97  
62 ATPase (Dewar et al., 2017; Sonnevile et al., 2017). In the absence of CRL2<sup>Lrr1</sup>, CMGs  
63 persist on chromatin until mitosis, but are then removed by a secondary, p97-dependent  
64 pathway that is controlled by an unknown E3 ubiquitin ligase (Sonneville et al., 2017).  
65 Re-replication is inhibited because *de novo* licensing of origins is suppressed in the S

66 and G2 phases of the cell cycle. In summary, faithful DNA replication requires the  
67 seamless integration of replication licensing, initiation, elongation, and termination.  
68 Errors in the process are detected by the DNA damage response, which activates repair  
69 mechanisms and prevents entry into mitosis in the setting of incomplete or abnormal  
70 replication.

71 DNA replication forks become stressed in a variety of circumstances, including  
72 the activation of oncogenes, the presence of replication-blocking DNA lesions, and  
73 nucleotide starvation (Cortez, 2015; Hills and Diffley, 2014; Saldivar et al., 2017).  
74 Replication stress, especially when combined with inhibition of checkpoint kinases, can  
75 cause replication fork “collapse”, which is defined as an irreversible state from which  
76 replication cannot be restarted (Cortez, 2015; Hills and Diffley, 2014; Pasero and  
77 Vindigni, 2017; Saldivar et al., 2017). Numerous experiments in different eukaryotic  
78 organisms indicated that fork collapse involves replisome disassembly (Cortez, 2015).  
79 However, these studies did not determine which component(s), when lost, trigger  
80 collapse, and they did not establish a causal relationship between replisome  
81 disassembly and collapse. More recent experiments suggest that fork collapse may not  
82 involve replisome disassembly (Cortez, 2015; De Piccoli et al., 2012). In some cases,  
83 fork collapse is accompanied by breakage of DNA at the fork, but the relationship  
84 between these two processes is unclear. In summary, there is little agreement on the  
85 basic processes that underlie the irreversible inactivation of DNA replication forks.

86 In vertebrates, the checkpoint kinase ATR protects forks from collapse, but the  
87 underlying mechanism has also been vigorously debated (Toledo et al., 2017). A  
88 widespread view is that ATR promotes the phosphorylation of unspecified proteins at

89 forks to prevent their collapse (Cortez, 2015). Another model is that the key function of  
90 ATR is to restrain cell cycle progression. One version of this idea is that in the absence  
91 of ATR, excessive origin firing leads to exhaustion of the nuclear pool of RPA, followed  
92 by fork breakage and replisome collapse (Toledo et al., 2013). Alternatively, ATR might  
93 prevent fork collapse by restraining mitotic entry, which would delay the activation of  
94 mitotic kinases such as PLK1 (Ragland et al., 2013). In agreement with the latter model,  
95 genetic studies suggest that, in mammals, restraining cell cycle progression is the  
96 essential function of ATR (Ruiz et al., 2016). Mitotic kinases can induce fork breakage  
97 by promoting the assembly of a MUS81-containing nuclease complex (Duda et al.,  
98 2016) or by triggering nuclear envelope breakdown, which grants the normally  
99 cytoplasmic GEN1 nuclease access to replication forks (West and Chan, 2018). Thus,  
100 there is no consensus on whether ATR prevents fork collapse primarily by local control  
101 at the fork or via restraint of cell cycle progression.

102         Replication fork breakage is sometimes beneficial. A prominent example involves  
103 common fragile sites (CFS), genomic loci that replicate late in S phase and are difficult  
104 to replicate because they contain few origins of replication and large genes with long  
105 transcripts (Glover et al., 2017). Common fragile site “expression,” the appearance of  
106 cytologically visible breaks and gaps, is promoted by low doses of aphidicolin because  
107 this drug delays duplication of already late-replicating loci. CFS are also among the  
108 most frequently rearranged loci in cancer genomes. In aphidicolin-treated cells, CFS co-  
109 localize with ultrafine DNA bridges that link the separating sister chromatids in  
110 anaphase (Baumann et al., 2007; Chan et al., 2007). Depletion of MUS81 exacerbates  
111 these segregation errors, inhibits CFS expression, and increases the frequency of

112 “53BP1 bodies” (Naim et al., 2013; Ying et al., 2013), structures thought to protect  
113 damaged DNA at these sites in the ensuing interphase (Harrigan et al., 2011; Lukas et  
114 al., 2011). Collectively, the data suggest that when cells enter mitosis before completion  
115 of DNA replication at CFS, MUS81 promotes breakage of stalled replication forks. This  
116 enables chromosome segregation, but comes with the risk of forming deletions and  
117 other rearrangements. These findings indicate that CFS expression is beneficial.  
118 However, no model has emerged that explains how CFS expression avoids deleterious  
119 outcomes such as the generation of acentric or iso-chromosomes.

120         Although breakage of a few stressed forks can be beneficial, concurrent  
121 breakage of many forks is deleterious as it leads to catastrophic chromosomal  
122 rearrangements. Several lines of evidence also implicate mitotic entry as one potential  
123 cause of extensive fork breakage. Cell fusion experiments (Johnson and Rao, 1970)  
124 and experiments on cells with micronuclei (Kato and Sandberg, 1968) showed that S  
125 phase chromosomes undergo “pulverization” upon exposure to mitotic cytoplasm.  
126 Although there was early disagreement about whether chromosome pulverization  
127 reflects discontinuous condensation or actual DNA breakage (Rao et al., 1982), recent  
128 work indicates that fragmentation does occur. First, premature mitotic entry triggered by  
129 inhibition of the WEE1 kinase causes extensive fork breakage in a manner that depends  
130 upon SLX4 and MUS81 (Dominguez-Kelly et al., 2011; Duda et al., 2016). Second,  
131 chromothripsis, a mutational process involving extensive chromosome fragmentation  
132 and rearrangement, may involve entry into mitosis of micronuclei undergoing DNA  
133 replication (Crasta et al., 2012; Leibowitz et al., 2015). Extensive fork breakage during  
134 mitosis is problematic as both homologous recombination and classical non-

135 homologous end joining are inactive during mitosis (Hustedt and Durocher, 2016). In  
136 summary, it has become apparent that genome instability in a variety of contexts is  
137 linked to replication fork breakage during mitosis. However, the general question of how  
138 mitosis impacts the normal program of DNA replication remains poorly understood.

139         Here, we used *Xenopus* egg extracts to explore the relationship between DNA  
140 replication and mitosis. We find that when extracts containing stressed replication forks  
141 are driven into mitosis with Cyclin B1-CDK1, the CMG helicase is ubiquitinated on its  
142 MCM7 subunit and subsequently extracted from chromatin by the CDC48/p97 ATPase.  
143 We show that the E3 ubiquitin ligase TRAIIP is critical for this pathway. TRAIIP-  
144 dependent CMG unloading leads to fork breakage, followed by end joining events that  
145 likely involve DNA polymerase  $\theta$  (Pol $\theta$ ). Importantly, in the absence of CRL2<sup>Lrr1</sup>, TRAIIP  
146 also promotes the removal of CMGs from replisomes that have undergone replication  
147 termination, indicating that TRAIIP clears the chromosomes of all CMGs in mitosis.  
148 Together, our results identify CMG loss from the fork as a new mechanism of replication  
149 fork collapse and ultimately fork breakage. We propose that breakage of a few  
150 converging forks that have failed to complete DNA synthesis in mitosis helps to maintain  
151 chromosome integrity whereas breakage of many forks leads to catastrophic  
152 rearrangements.

153



154 **RESULTS**

155 **Mitotic CDK triggers aberrant processing of stressed DNA replication forks**

156 To examine the effect of mitotic CDK on DNA replication, we employed *Xenopus* egg  
157 extracts, which can be permanently arrested in states that mimic S phase or mitosis  
158 while also allowing careful monitoring of DNA replication forks. To this end, plasmid  
159 DNA was incubated in a high-speed supernatant (HSS) of *Xenopus* egg extract. HSS  
160 promotes the assembly onto DNA of pre-replication complexes (pre-RCs) containing  
161 double hexamers of the MCM2-7 ATPase (Figure 1A). The subsequent addition of a  
162 nucleoplasmic extract (NPE) leads to the association of CDC45 and GINS with each  
163 MCM2-7 hexamer to form two active CMG DNA helicases, which unwind DNA at the  
164 fork, promoting a single, complete round of DNA replication (Figure 1B, lanes 1-6)  
165 (Walter et al., 1998). Because the mitotic CDK Cyclin B1-CDK1 (B1-CDK1) inhibits  
166 licensing in egg extract (Hendrickson et al., 1996; Prokhorova et al., 2003), we added it  
167 after pre-RC formation (Figure 1A) at a concentration that induces chromosome  
168 condensation (Figures S1A-S1C) and condensin recruitment (Figures S1D and S1E).  
169 As we showed previously (Prokhorova et al., 2003), B1-CDK1 increased the rate of  
170 DNA replication in NPE (Figure 1B, compare lanes 1-6 and 13-18). This acceleration  
171 was due in part to increased origin firing, as shown by enhanced CMG loading (Figure  
172 S1F). However, in the absence of other perturbations, all replication products were open  
173 circular or supercoiled species (Figure 1B, lanes 13-18), indicating that B1-CDK1-  
174 induced chromatin condensation does not cause aberrant DNA replication.

175         Given the evidence that stressed DNA replication forks undergo breakage during  
176 mitosis (e.g. at common fragile sites, see introduction), we added a low concentration of

177 the replicative DNA polymerase inhibitor aphidicolin (APH; 2.2  $\mu$ M) to slow fork  
178 progression (Figure 1B, lanes 7-12). Intriguingly, the combination of B1-CDK1 and APH  
179 (Figure 1B, lanes 19-24) led to the appearance of a new replication product that  
180 migrated at the very top of the gel. This aberrant replication product (ARP) comprised  
181 ~6% of total replication for a 3 kb plasmid and up to 30% for a 9 kb plasmid (data not  
182 shown), presumably because the larger plasmid hosts more replication forks. The ARPs  
183 were not resolved by Topoisomerase I or Topoisomerase II treatment, indicating they  
184 are not plasmid topoisomers (data not shown). Thus, in the presence of replication  
185 stress, mitotic CDK induces aberrant DNA replication.

186 To mimic incomplete DNA replication in mitosis, as occurs at common fragile  
187 sites, we stalled replication forks on either side of defined replication fork barriers before  
188 addition of B1-CDK1. First, we replicated a plasmid containing an array of 48 *lacO* sites  
189 (p[*lacO*<sub>48</sub>]) bound by the *lac* repressor (LacR) (Figure 1C). As expected (Dewar et al.,  
190 2015), replication forks stalled at the outer edges of the LacR array, generating a “theta”  
191 ( $\theta$ ) structure (Figures 1C and 1D, lanes 11-15). Strikingly, in the presence of B1-CDK1,  
192 the theta molecules disappeared and ARPs accumulated (Figure 1D, lanes 16-20).  
193 ARPs were not generated when LacR-mediated fork stalling was prevented with IPTG  
194 (Figure 1E), or in the presence of the CDK1 inhibitor (CDK1-i) RO-3306 (Figure S1G).  
195 Furthermore, the S-phase CDK, Cyclin E-CDK2, did not induce ARPs (data not shown).  
196 Second, we induced replication fork stalling with covalent DNA-protein crosslinks  
197 (DPCs). We replicated a plasmid substrate (pDPC), which contains two site-specific  
198 DPCs on each leading strand template (Figure 1F). As expected (Duxin et al., 2014), in  
199 the absence of B1-CDK1, replication of pDPC first yielded theta structures when forks

200 transiently paused at the DPC. Plasmids then resolved into open circular (OC) species  
201 that persisted due to slow translesion synthesis past the peptide adduct generated by  
202 DPC proteolysis (Figure 1F, upper arrow and Figure 1G, lanes 13-18). In the presence  
203 of B1-CDK1, we again observed a substantial accumulation of ARPs (Figure 1G, lanes  
204 19-24). In summary, mitotic CDK caused aberrant processing of replication forks stalled  
205 by aphidicolin, non-covalent nucleoprotein complexes, and DPCs.

206

### 207 **Mitotic processing of stalled replication forks leads to complex chromosomal** 208 **rearrangements**

209 To determine the structure of mitotic ARPs, we replicated the 4.6 kb LacR plasmid in  
210 the presence and absence of B1-CDK1 and digested the replication products with AlwNI  
211 and AflII, which cuts the plasmid into a 1.9 kb fragment and a 2.7 kb fragment  
212 encompassing the *lacO* repeats (Figure 2A). In the absence of B1-CDK1, fully  
213 replicated 1.9 kb fragments quickly accumulated, whereas the rest of the plasmid  
214 migrated as a double-Y structure that gradually increased in size due to slow  
215 progression of forks through the LacR array (Figure 2B, middle panel, lanes 1-7 and  
216 Figure 2C; see also (Dewar et al., 2015) Figure S4). In the presence of B1-CDK1, the  
217 1.9 kb fragment again accumulated quickly and persisted, demonstrating that this *lacO*-  
218 free region was replicated efficiently (Figure 2B, middle panel, lanes 8-14). However,  
219 the double-Y structure containing the *lacO* array rapidly disappeared. Thus, in the  
220 presence of B1-CDK1, DNA processing occurs specifically on molecules containing  
221 stalled forks.

222           When the replication products were digested only with AlwNI, we observed B1-  
223 CDK1-dependent disappearance of the now larger double-Y structure (Figure 2B,  
224 bottom panel, lanes 8-14). In addition, we detected a new series of species migrating  
225 between ~3 and ~4 kb (Figure 2B, bottom panel; smear). We hypothesized that when  
226 replication forks enter the array and slow down or stall, B1-CDK1 promotes their  
227 collapse and breakage. The resulting double-strand breaks (DSBs) subsequently  
228 undergo joining with DSBs from broken forks on other plasmids, generating ARPs  
229 (Figures 2C and S2A). If replication forks collapse at the outer edges of the array, the  
230 size of the end joining product after AlwNI digestion is close to 3.1 kb because most of  
231 the 1.5 kb *lacO* array is lost; collapse further into to the array generates larger products,  
232 accounting for the 3-4 kb range of products observed (Figure S2B). To test this  
233 hypothesis, the 3-4 kb species were cloned and sequenced using primers immediately  
234 flanking the *lacO* array (Figure S2C). In contrast to control clones (generated from  
235 replication in the absence of LacR), all of which contained 48 *lacO* repeats, the 24  
236 clones from the 3-4 kb smear contained fewer than 48 *lacO* repeats (Figure 2D,  
237 products a-n). This result confirms that replication forks collapsed within the *lacO* array  
238 and then underwent end joining with loss of *lacO* repeats. Seventeen of these products  
239 (a-g) involved simple deletions of the *lacO* repeats. Repeats were mostly lost in blocks  
240 of four *lacO* sites, the repeating unit within the *lacO* array that also contains four unique  
241 spacer sequences. This suggests that the deletions might occur via single strand  
242 annealing (SSA) (Bhargava et al., 2016), which generates deletions between  
243 homologous sequences of this length. The remaining 7 clones had complex  
244 rearrangements, including insertions that likely arose from replication template-

245 switching events (Figure 2D; product h-n). For example, product h appears to have  
246 arisen from fork collapse at the 5<sup>th</sup> repeat, followed by two successive microhomology-  
247 mediated strand invasion and copying events, followed by joining to a second fork that  
248 broke at the 15<sup>th</sup> repeat (Figure 2E). Together, the sequencing data strongly suggest  
249 that stressed replication forks collapse in the presence of B1-CDK1, generating DSBs  
250 that subsequently undergo end joining (Figures 2C and S3A), sometimes after repeated  
251 template-switching (Figure 2E).

252

### 253 **Immunodepletion of DNA Pol $\theta$ reduces mitotic ARPs**

254 We next addressed the mechanism of end joining after mitotic CDK-induced fork  
255 collapse. As expected (Hustedt and Durocher, 2016; Peterson et al., 2011), RAD51,  
256 which is essential for homologous recombination (HR), did not bind chromatin in the  
257 presence of B1-CDK1 (Figure S3A). Accordingly, immunodepletion of RAD51 from egg  
258 extracts had no effect on B1-CDK1-induced ARP formation (Figures S3B and S3C), nor  
259 did inhibition of RAD51 with a BRC peptide derived from BRCA2 (Figure S3D) (Long et  
260 al., 2011). Further, classical non-homologous end joining (NHEJ), which is also normally  
261 inhibited during mitosis (Hustedt and Durocher, 2016), was not required for ARP  
262 formation (Figure S3E). The structures of the mitotic ARPs (Figures 2C-2E) suggested  
263 that MMEJ (microhomology-mediated end joining, also called alternative end joining)  
264 and/or SSA might be responsible for mitotic DSB repair. Indeed, immunodepletion of  
265 DNA polymerase Pol $\theta$  (Figure 3A), a major mediator of MMEJ known to make errors  
266 due to replicative template-switching (Wyatt et al., 2016), decreased ARPs during  
267 replication of LacR plasmid (Figures 3B and S3F) and pDPC (Figures 3C and S3G).

268 Although we have so far not rescued this effect with purified Pol $\theta$  protein, the  
269 involvement of Pol $\theta$  is consistent with the nature of the end joining products shown in  
270 Figures 2D-2E. Thus, in mitotic extracts where HR and NHEJ are inactive, MMEJ  
271 appears to become a major pathway that mediates joining of DNA ends after fork  
272 breakage.

273

### 274 **Chromatin condensation does not cause fork breakage**

275 We next sought to address how mitotic CDK causes fork instability. Chromatin  
276 condensation, a central event in mitosis, has long been proposed to cause DNA  
277 damage in under-replicated regions (El Achkar et al., 2005; Lukas et al., 2011). We  
278 therefore examined the role of chromatin condensation on mitotic fork collapse.  
279 Although immunodepletion of the condensin subunit SMC2 inhibited B1-CDK1-induced  
280 chromosome condensation (Figures S4A-B), it did not affect the formation of ARPs  
281 (Figures 4A and S4C). This finding is consistent with our results that condensin  
282 recruitment did not induce DNA damage in the absence of replication stress (Figures 1B,  
283 1D, 1G and S1C-S1E). These data indicate that chromatin condensation, *per se*, is  
284 neither necessary nor sufficient for fork instability in mitotic egg extracts.

285

### 286 **CMG unloading at stalled forks initiates mitotic fork breakage**

287 When replication forks stall on either side of a DNA inter-strand crosslink (ICL) in  
288 interphase egg extracts, CMGs are ubiquitylated and unloaded from chromatin by the  
289 CDC48/p97 ATPase (Fullbright et al., 2016; Semlow et al., 2016). The loss of CMGs

290 from the stalled forks enables XPF-dependent ICL incision (Klein Douwel et al., 2014),  
291 which unhooks the lesion, leading to the formation of a double-stranded DNA break that  
292 is subsequently repaired via homologous recombination (Long et al., 2014). Inspired by  
293 this mechanism, we asked whether B1-CDK1-induced fork breakage at single stalled  
294 forks is caused by CMG unloading.

295 As shown previously (Dewar et al., 2015), CMGs that stalled at a LacR array did  
296 not dissociate from chromatin in interphase extracts (Figure 4B, lane 1). Intriguingly, in  
297 the presence of B1-CDK1, CMGs were unloaded efficiently (Figure 4B, lane 5). Addition  
298 of the p97 inhibitor NMS-873 (p97-i) prevented B1-CDK1-triggered CMG unloading and  
299 revealed a ladder of MCM7 species (Figure 4B, lane 7, red bracket) that was collapsed  
300 by USP21, a non-specific deubiquitinating enzyme (Figure 4B, lane 8). Therefore, B1-  
301 CDK1 induces MCM7 ubiquitylation and CMG unloading from single stalled forks, in the  
302 absence of replication fork convergence. Strikingly, p97-i suppressed the formation of  
303 ARPs on the LacR plasmid (Figure 4C; see below for explanation of OC and SC product  
304 formation), strongly suggesting that B1-CDK1-induced CMG unloading triggers  
305 replication fork breakage. Consistent with this interpretation, CMG unloading normally  
306 preceded replication fork breakage (Figure S4D). As seen for LacR plasmid, p97-i also  
307 prevented ARP formation on pDPC (Figures 4D and S4E). Our data demonstrate that  
308 breakage of stalled DNA replication forks in the presence of mitotic CDK requires p97  
309 activity, likely due to its role in CMG unloading.

310

311 **TRAIP promotes CMG unloading from stalled forks in mitosis**

312 We next sought to identify the E3 ubiquitin ligase that promotes MCM7 ubiquitylation in  
313 mitosis. Although CRL2<sup>Lrr1</sup> normally acts on CMGs that encircle dsDNA after passing  
314 each other during replication termination (Dewar et al., 2017), it was possible that B1-  
315 CDK1 might target it to stalled CMGs that encircle ssDNA. However, while the Cullin  
316 inhibitor MLN-4924 (Cul-i) blocked CMG unloading during replication termination in  
317 interphase (Figure S5A, compare lanes 1 and 4), it had almost no effect on mitotic CMG  
318 unloading from stalled forks (Figure S5A, compare lanes 3 and 6), indicating the latter  
319 process does not involve CRL2<sup>Lrr1</sup>. Therefore, a Cullin-independent E3 ubiquitin ligase  
320 is responsible for MCM7 ubiquitylation upon premature mitotic entry.

321 The E3 ubiquitin ligase TRAIIP counteracts replication stress to maintain genome  
322 integrity (Feng et al., 2016; Harley et al., 2016; Hoffmann et al., 2016; Soo Lee et al.,  
323 2016), and we recently found that it is bound to replication forks that have stalled at a  
324 LacR array (Dewar et al., 2017). We therefore asked whether TRAIIP is responsible for  
325 CMG unloading from stalled forks in mitosis. Strikingly, immunodepletion of TRAIIP from  
326 egg extract (Figure 5A) prevented B1-CDK1-induced CMG unloading at stalled forks  
327 (Figure 5B, compare lanes 2 and 6), and it eliminated the polyubiquitylation of MCM7  
328 detected in the presence of p97-i (Figure 5B, compare lanes 4 and 8). Furthermore,  
329 TRAIIP depletion abolished the formation of ARPs during replication of LacR plasmid  
330 (Figure 5C, compare lanes 7-12 and 19-24) and pDPC (Figure S5B). To determine  
331 whether the effect of TRAIIP depletion was specific, we purified recombinant wild type  
332 TRAIIP protein (rTRAIIP<sup>WT</sup>) from bacteria (Wu et al., submitted). Addition of rTRAIIP<sup>WT</sup> to  
333 TRAIIP-depleted egg extracts rescued formation of mitotic ARPs (Figure 5D, compare  
334 lanes 13-18 to 7-12; and Figures S5C-S5E). We also added back TRAIIP carrying the



335 substitution R18C, which was identified in a human patient with primordial dwarfism  
336 (Harley et al., 2016) and that severely reduces the E3 ligase activity of TRAIP (Wu et al.,  
337 submitted). Unlike rTRAIP<sup>WT</sup>, rTRAIP<sup>R18C</sup> supported only low levels of ARP formation  
338 on LacR plasmid (Figure 5D, compare lanes 19-24 to 13-18). We conclude that TRAIP  
339 is essential for replication fork collapse at stalled forks in mitosis, most likely due to a  
340 role in MCM7 ubiquitylation and p97-dependent CMG unloading.

341 To understand how TRAIP is regulated, we monitored its binding to chromatin.  
342 As we showed previously (Dewar et al., 2017), in interphase egg extract TRAIP is  
343 associated with replisomes that have stalled at a LacR array (Figure 5B, lane 1).  
344 Therefore, TRAIP is present at forks before they are exposed to B1-CDK1. Upon  
345 addition of B1-CDK1, TRAIP was lost from the chromatin, but not when CMG unloading  
346 was inhibited with p97-i (Figure 5B, compare lanes 2 and 4). Interestingly, chromatin-  
347 bound TRAIP did not increase in the presence of B1-CDK1 and p97-i compared to the  
348 level observed before B1-CDK1 addition (Figure 5B, compare lanes 1 and 4). The data  
349 suggest that TRAIP is normally part of the replisome and that it is activated by mitotic  
350 CDK, whereupon it promotes MCM7 ubiquitylation and CMG unloading.

351

### 352 **TRAIP promotes fork progression through a LacR array**

353 As discussed above, p97-i not only prevented the collapse of LacR-stalled forks in  
354 mitotic extracts (Figure 4C), but also promoted the conversion of theta structures  
355 normally seen in interphase extract (Figure 4C, lanes 6-10) into mature replication  
356 products--open circular (OC) and supercoiled plasmid (SC) monomers (Figure 4C,  
357 lanes 16-20). Therefore, when CMG unloading is blocked in mitotic extracts, the

358 replisome progresses through the LacR array more efficiently than in interphase extract.  
359 We wondered whether this enhanced fork progression depends on TRAIP. To this end,  
360 we combined p97-i treatment with TRAIP depletion. In this setting, theta structures  
361 accumulated, and the appearance of mature replication products was strongly reduced  
362 (Figure 5E, compare lanes 7-12 and 19-24), indicating that TRAIP promotes efficient  
363 replication fork progression through a LacR array. Thus, our data suggest that TRAIP-  
364 dependent CMG ubiquitylation not only promotes CMG unloading but also more efficient  
365 disruption of replication barriers when CMG unloading is blocked.

366

367 **Fork breakage in mitotic extracts is distinct from programmed incisions during**  
368 **ICL repair**

369 The breakage of single stalled forks in mitotic extracts shown here is similar to the  
370 breakage of forks that have converged on cisplatin ICLs in interphase egg extracts in  
371 that both events require TRAIP-dependent CMG unloading (Wu et al., submitted). We  
372 therefore asked whether mitotic fork breakage also requires FANCI-FANCD2, XPF-  
373 ERCC1, or SLX1-SLX4, which promote DNA incisions during ICL repair. As shown in  
374 Figures S5F and S5G, immunodepletion of FANCI-FANCD2 did not prevent mitotic ARP  
375 formation on LacR plasmid, nor did depletion of SLX4, XPF, or MUS81 (data not  
376 shown). We speculate that there might be redundancy among SLX1, XPF, and MUS81  
377 for mitotic fork breakage, or that other nucleases are involved. Our results indicate that  
378 while ICL incisions and B1-CDK1-dependent replication fork collapse both require  
379 TRAIP-dependent CMG unloading, these processes are otherwise mechanistically  
380 distinct.

381

382 **TRAIP promotes CMG unloading from terminated replisomes in mitosis**

383 In S phase, CMG unloading during replication termination requires the E3 ubiquitin  
384 ligase CRL2<sup>Lrr1</sup>. However, in worms lacking CRL2<sup>Lrr1</sup>, CMGs persist on chromatin until  
385 late prophase, when they are unloaded from chromatin by p97 (Sonneville et al., 2017).  
386 This observation indicates that an alternative ubiquitylation pathway acts to unload  
387 terminated CMGs in mitosis, but the relevant E3 ubiquitin ligase has not been identified.  
388 To determine whether TRAIP is involved in this pathway, we first addressed whether  
389 *Xenopus* egg extracts recapitulate mitotic unloading of CMGs that have undergone  
390 replication termination. To this end, we replicated a plasmid in interphase egg extracts  
391 in the presence of Cullin inhibitor MLN-4924 (Cul-i). In this condition, DNA synthesis  
392 went to completion (Figure S6A), but CMG unloading was blocked due to inhibition of  
393 CRL2<sup>Lrr1</sup> (Figure 6A, compare lanes 1 and 2; (Dewar et al., 2017)). Importantly, upon  
394 the addition of B1-CDK1, CMG was unloaded despite the presence of Cul-i (Figure 6A,  
395 lane 6), and this unloading was blocked by p97-i (Figure 6A, lane 8). Therefore, as seen  
396 in worms, frog egg extracts support CRL2<sup>Lrr1</sup>-independent CMG unloading in a mitotic  
397 environment. Interestingly, in the presence of p97-i, MCM7 was ubiquitylated even more  
398 extensively than in interphase extract (Figure 6A, compare lanes 7-8 and 3-4 and Figure  
399 S6B, compare lanes 5-6 and 1-2). The hyper-ubiquitylation was insensitive to Cul-i  
400 (Figure 6A, lane 8), consistent with it being CRL2<sup>Lrr1</sup>-independent. Importantly, TRAIP  
401 depletion inhibited B1-CDK1-induced CMG unloading from terminated forks (Figure 6B,  
402 compare lanes 1 and 4 and Figure S6C, compare lanes 1 and 4) and MCM7 hyper-  
403 ubiquitylation (Figure 6B, compare lanes 2 and 5). These defects were reversed by

404 rTRAIP<sup>WT</sup> but not rTRAIP<sup>R18C</sup> (Figures 6B and S6C). Therefore, in the absence of  
405 CRL2<sup>Lrr1</sup> activity, TRAIP promotes an alternative pathway to unload terminated CMGs in  
406 mitosis. Together, our results suggest that in mitosis, TRAIP removes all CMGs from  
407 chromatin, whether they have terminated or stalled (Figure S6D), with the latter case  
408 leading to fork breakage and complex end joining events (Figure 7).

409

410 **DISCUSSION**

411 Numerous lines of evidence indicate that when cells enter mitosis before DNA  
412 replication is complete, replication forks collapse and break. However, the mechanism  
413 of collapse and how it affects genome stability remain obscure. Our data provide direct  
414 evidence that TRAIIP-dependent replisome disassembly causes fork breakage, and they  
415 suggest a new model for the avoidance of genome instability when cells enter mitosis  
416 with unreplicated DNA.

417 Our findings suggest that TRAIIP promotes CMG unloading in diverse contexts. In  
418 mitosis, TRAIIP targets both stalled CMGs, which encircle ssDNA, and terminated  
419 CMGs, which probably encircle dsDNA (Figure S6Di and ii; (Dewar et al., 2015)). We  
420 propose that in the presence of mitotic CDK, TRAIIP promotes the ubiquitylation and  
421 unloading of all CMGs, regardless of their configuration on DNA. Interestingly, TRAIIP  
422 also functions in interphase: when two forks converge on an ICL, TRAIIP is required to  
423 ubiquitylate CMG, and ubiquitylated CMG in turn dictates the choice between two  
424 mechanisms of ICL repair (Wu et al., submitted; Figure S6Diii). Although TRAIIP  
425 promotes CMG ubiquitylation in multiple contexts, it does not target CMGs that have  
426 terminated in interphase, a function performed by CRL2<sup>Lrr1</sup> (Figure S6Div; Dewar et al.  
427 2017), nor does it appear to target CMG at single moving or stalled forks in interphase,  
428 which would cause premature fork collapse. Thus, TRAIIP appears to be more selective  
429 in interphase than in mitosis, and future work will explore the basis of this difference.

430 There is currently no consensus on how replisome disassembly relates to  
431 replication fork collapse (Cortez, 2015; Toledo et al., 2017). *A priori*, the simplest  
432 mechanism of fork collapse would involve the loss of an essential replisome component

433 that cannot be reloaded in S phase. If such a component also protects the fork, its loss  
434 would inevitably also cause breakage. MCM2-7 is the prime candidate, as it is the only  
435 known replication factor that cannot be loaded *de novo* in S phase (Deegan and Diffley,  
436 2016). Consistent with this idea, we find that unloading of CMG (whose core component  
437 is MCM2-7) precedes fork breakage, and inhibition of CMG unloading via TRAIIP  
438 depletion or p97-i addition suppresses breakage. To rigorously determine whether  
439 MCM7 ubiquitylation is necessary to promote CMG unloading and breakage, it will be  
440 important to mutate relevant ubiquitylation sites in MCM7. However, our mass  
441 spectrometry analysis has not identified ubiquitylated lysine residues in MCM7 (data not  
442 shown). Nevertheless, we provide the first evidence that CMG unloading is causally  
443 linked to replication fork breakage. We propose that loss of CMG might represent a  
444 common trigger of fork collapse that also leads to breakage due to exposure of the fork  
445 to one or more nucleases. It will be interesting to determine how this pathway relates to  
446 the loss of RPA at the fork, which has also been proposed to trigger fork collapse and  
447 breakage (Toledo et al., 2013).

448         After stressed forks undergo breakage in mitotic extract, the newly formed DNA  
449 ends undergo two classes of joining events, as revealed by DNA sequencing. The first  
450 class involves deletions of blocks of four *lacO* sites, the repeating unit within the *lacO*  
451 array. These products are most readily explained by single-strand annealing, and they  
452 are probably favored by the highly repetitive nature of the *lacO* array. SSA is usually  
453 RAD52 dependent (Bhargava et al., 2016), and RAD52 has recently been shown to  
454 mediate DNA repair synthesis during mitosis (Bhowmick et al., 2016). However, we  
455 have not been able to test the involvement of RAD52 due to an inability to raise useful

456 antibodies against *Xenopus* RAD52. The second class of end joining products involves  
457 multiple template-switching events that are mediated by short stretches of micro-  
458 homology, indicative of DNA Pol $\theta$ -mediated DNA end joining (TMEJ (Wyatt et al.,  
459 2016)). Consistent with this idea, mitotic aberrant replication products were reduced in  
460 Pol $\theta$ -depleted extracts but not when homologous recombination (HR) or classical non-  
461 homologous end joining (NHEJ) was inhibited. Our observation that broken forks appear  
462 to be processed primarily by SSA and TMEJ is consistent with the finding that HR and  
463 NHEJ are inhibited in mitosis (Figure S3A and (Hustedt and Durocher, 2016; Ochs et  
464 al., 2016; Peterson et al., 2011)). Notably, we detected only short-tract template  
465 switches typical of TMEJ. If, before end joining, template-switching events mediated by  
466 Pol $\theta$  or other factors were followed by more processive DNA synthesis that is templated  
467 near the break, duplications could result that resemble copy number alterations  
468 observed in human cancer and congenital disease (Carvalho and Lupski, 2016;  
469 Leibowitz et al., 2015).

470         When converging forks are unable to complete DNA replication by anaphase, as  
471 seen at common fragile sites (CFS), chromosome non-disjunction and aneuploidy can  
472 result. We identify two mechanisms by which TRAIIP might help avoid this outcome.  
473 First TRAIIP enhances CMG's ability to overcome replisome barriers (Figure 5E),  
474 promoting the completion of replication before anaphase. Second, if the obstacle cannot  
475 be overcome, the activation of TRAIIP stimulates CMG unloading and fork breakage. We  
476 propose that breakage occurs preferentially on the two leading strand templates  
477 because these are normally protected by CMG (Fu et al., 2011) and therefore exposed  
478 after CMG dissociation (Figure S7). In this scenario, one intact daughter chromosome is

479 immediately restored by gap filling, and the other is regenerated via joining of the two  
480 broken ends, albeit with sister chromatid exchange and at the cost of of a small deletion  
481 (Figure S7, left branch). Importantly, this mechanism avoids the formation of acentric  
482 and dicentric chromosomes that would result from random breakage of the forks (Figure  
483 S7, right branch) and thus helps account for the fact that breakage at CFS is mostly  
484 beneficial (Bhowmick and Hickson, 2017; Minocherhomji et al., 2015; Naim et al., 2013;  
485 Ying et al., 2013). Strikingly, CFS expression induces chromosomal alterations that  
486 exhibit key features expected of our model, including submicroscopic deletions covering  
487 the CFS locus, microhomologies at the breakpoint junctions, and a very high frequency  
488 of sister chromatid exchanges (Glover et al., 2017) (Figure S7, left branch). Unlike our  
489 biased breakage and end joining model, break-induced replication models of CFS  
490 expression (Bhowmick et al., 2016; Minocherhomji et al., 2015) do not readily account  
491 for the high incidence of sister chromatid exchanges at CFS, and they would not be  
492 beneficial at CFS located distant from chromosome ends.

493 We speculate that TRAIIP-dependent CMG unloading contributes to other  
494 genome instability phenomena that were previously linked to mitotic DNA replication.  
495 These include: chromosome breakage that occurs when cells in the S and M phases  
496 are fused (Duelli et al., 2007; Johnson and Rao, 1970; Rao et al., 1982), or when mitotic  
497 CDK is prematurely activated in S phase by WEE1 inhibition (Dominguez-Kelly et al.,  
498 2011; Duda et al., 2016); and chromothripsis in micronuclei that are still engaged in  
499 replication when they enter mitosis (Crasta et al., 2012; Leibowitz et al., 2015; Ly et al.,  
500 2017). In these cases, massive chromosomal breakage is deleterious as it leads to  
501 genome instability or cell death. Notably, chromosome fragmentation in the presence of



502 WEE1 inhibitor and common fragile site expression are both MUS81-dependent  
503 (Dominguez-Kelly et al., 2011; Duda et al., 2016; Naim et al., 2013; Ying et al., 2013). In  
504 contrast, fork breakage in our experiments was not inhibited by MUS81 depletion.  
505 Whether this reflects a real difference in these processes, incomplete MUS81 depletion  
506 in extracts, or greater redundancy with other nucleases in extracts remains to be  
507 determined. It will be interesting to test the hypothesis that TRAIIP underlies many  
508 different genome instability phenomena in mitosis.

509         We showed that in the absence of CRL2<sup>Lrr1</sup> activity, TRAIIP triggers the unloading  
510 of terminated CMGs in mitosis. Therefore, TRAIIP likely represents the activity that  
511 removes CMGs from late prophase chromosomes in LRR-1-deficient worms (Sonneville  
512 et al., 2017). Terminated CMGs that remain on chromatin probably encircle dsDNA  
513 (Dewar et al., 2015) and thus may prevent strand separation during transcription or  
514 replication in the next cell cycle. Thus, we propose that TRAIIP-dependent unloading of  
515 terminated CMGs that evaded the action of CRL2<sup>Lrr1</sup> may also promote genome  
516 maintenance. Whether the dwarfism phenotype observed in patients with hypomorphic  
517 TRAIIP mutations results from defective ICL repair (Wu et al., submitted), defective CMG  
518 unloading from stalled forks in mitosis, persistence of a few terminated CMGs into the  
519 next cell cycle, or the absence of other TRAIIP-dependent processes remains to be  
520 established.

521         Although it had been widely thought that the checkpoint kinase ATR supports cell  
522 viability and suppression of replication fork collapse via phosphorylation of proteins at  
523 the fork, no ATR substrates have been identified that definitively validate this  
524 mechanism (Cortez, 2015; Pasero and Vindigni, 2017; Saldivar et al., 2017). An

525 alternative view is that the primary role of ATR in stabilizing forks is indirect (Toledo et  
526 al., 2017). Thus, it has been proposed that ATR inhibition of late origin firing prevents  
527 exhaustion of the nuclear RPA pool, causing fork deprotection and breakage (Toledo et  
528 al., 2013). Another idea is that suppression of mitotic entry is the means by which ATR  
529 stabilizes forks, including in the absence of exogenous replication stress (Eykelboom  
530 et al., 2013; Ragland et al., 2013; Ruiz et al., 2016). Consistent with the latter model,  
531 ATR is not required to stabilize stalled DNA replication forks in egg extracts that are  
532 permanently arrested in interphase (Luciani et al., 2004). Moreover, we show that when  
533 stressed forks are exposed to mitotic CDK, forks break, even without ATR inhibition or  
534 RPA depletion. Collectively, our data are most consistent with the idea that there is no  
535 intrinsic requirement for ATR in stabilizing forks, as long as these are not exposed to  
536 mitotic CDK activity. It will be interesting to determine whether mitotic entry and RPA  
537 exhaustion activate distinct programs of replication fork collapse and breakage.

538 In summary, our data suggest that when TRAIIP becomes active in mitosis, a  
539 short temporal window opens in which replication forks can overcome remaining  
540 obstacles and terminate. The window closes when all CMGs are ubiquitylated and  
541 extracted from chromatin. Normally, CMG removal and fork breakage promotes  
542 chromosome segregation and genome integrity, but when too many forks are present,  
543 massive DNA fragmentation results, leading to cell death or transformation. Collectively,  
544 our results suggest that TRAIIP serves a crucial role in minimizing the conflict between  
545 incomplete DNA replication and mitosis.

546

547

548 **ACKNOWLEDGMENTS**

549 We thank James Dewar, Emily Low, Justin Sparks, Kyle Vrtis, Daniel Finley, Puck  
550 Knipscheer, and Jan-Michael Peters for experimental protocols or reagents. We thank  
551 Alan D'Andrea, Randy King, Ralph Scully, Karim Labib, and members of the Pellman  
552 and Walter laboratories for helpful discussion and critical reading of the manuscript.  
553 R.A.W. was supported by postdoctoral fellowship 131415-PF-17-168-01-DMC from the  
554 American Cancer Society. D.P. was supported by NIH grant CA213404. J.C.W. was  
555 supported by NIH grants GM080676 and HL098316. D.P. and J.C.W. are investigators  
556 of the Howard Hughes Medical Institute.

557

558 **AUTHOR CONTRIBUTIONS**

559 D.P. initiated the project. L.D., D.P., and J.C.W. designed the experiments, interpreted  
560 the results, and prepared the manuscript. O.V.K. contributed Figures 6 and S6A-C;  
561 R.A.W. contributed rTRAIP<sup>WT</sup> and rTRAIP<sup>R18C</sup> proteins; L.D. performed all other  
562 experiments.

563

564 **DECLARATION OF INTERESTS**

565 The authors declare no competing interests.

566 **REFERENCES**

- 567 Baumann, C., Korner, R., Hofmann, K., and Nigg, E.A. (2007). PICH, a centromere-  
568 associated SNF2 family ATPase, is regulated by Plk1 and required for the spindle  
569 checkpoint. *Cell* 128, 101-114.
- 570 Bhargava, R., Onyango, D.O., and Stark, J.M. (2016). Regulation of Single-Strand  
571 Annealing and its Role in Genome Maintenance. *Trends Genet* 32, 566-575.
- 572 Bhowmick, R., and Hickson, I.D. (2017). The "enemies within": regions of the genome  
573 that are inherently difficult to replicate. *F1000Res* 6, 666.
- 574 Bhowmick, R., Minocherhomji, S., and Hickson, I.D. (2016). RAD52 Facilitates Mitotic  
575 DNA Synthesis Following Replication Stress. *Mol Cell* 64, 1117-1126.
- 576 Blow, J.J., and Laskey, R.A. (1986). Initiation of DNA replication in nuclei and purified  
577 DNA by a cell-free extract of *Xenopus* eggs. *Cell* 47, 577-587.
- 578 Budzowska, M., Graham, T.G., Sobock, A., Waga, S., and Walter, J.C. (2015).  
579 Regulation of the Rev1-pol zeta complex during bypass of a DNA interstrand cross-link.  
580 *EMBO J* 34, 1971-1985.
- 581 Carvalho, C.M., and Lupski, J.R. (2016). Mechanisms underlying structural variant  
582 formation in genomic disorders. *Nat Rev Genet* 17, 224-238.
- 583 Chan, K.L., North, P.S., and Hickson, I.D. (2007). BLM is required for faithful  
584 chromosome segregation and its localization defines a class of ultrafine anaphase  
585 bridges. *EMBO J* 26, 3397-3409.
- 586 Cortez, D. (2015). Preventing replication fork collapse to maintain genome integrity.  
587 *DNA Repair (Amst)* 32, 149-157.
- 588 Crasta, K., Ganem, N.J., Dagher, R., Lantermann, A.B., Ivanova, E.V., Pan, Y., Nezi, L.,  
589 Protopopov, A., Chowdhury, D., and Pellman, D. (2012). DNA breaks and chromosome  
590 pulverization from errors in mitosis. *Nature* 482, 53-58.
- 591 De Piccoli, G., Katou, Y., Itoh, T., Nakato, R., Shirahige, K., and Labib, K. (2012).  
592 Replisome stability at defective DNA replication forks is independent of S phase  
593 checkpoint kinases. *Mol Cell* 45, 696-704.
- 594 Deegan, T.D., and Diffley, J.F. (2016). MCM: one ring to rule them all. *Curr Opin Struct*  
595 *Biol* 37, 145-151.
- 596 Dewar, J.M., Budzowska, M., and Walter, J.C. (2015). The mechanism of DNA  
597 replication termination in vertebrates. *Nature* 525, 345-350.

- 598 Dewar, J.M., Low, E., Mann, M., Raschle, M., and Walter, J.C. (2017). CRL2Lrr1  
599 promotes unloading of the vertebrate replisome from chromatin during replication  
600 termination. *Genes Dev* 31, 275-290.
- 601 Dominguez-Kelly, R., Martin, Y., Koundrioukoff, S., Tanenbaum, M.E., Smits, V.A.,  
602 Medema, R.H., Debatisse, M., and Freire, R. (2011). Wee1 controls genomic stability  
603 during replication by regulating the Mus81-Eme1 endonuclease. *J Cell Biol* 194, 567-  
604 579.
- 605 Duda, H., Arter, M., Gloggnitzer, J., Teloni, F., Wild, P., Blanco, M.G., Altmeyer, M., and  
606 Matos, J. (2016). A Mechanism for Controlled Breakage of Under-replicated  
607 Chromosomes during Mitosis. *Dev Cell* 39, 740-755.
- 608 Duelli, D.M., Padilla-Nash, H.M., Berman, D., Murphy, K.M., Ried, T., and Lazebnik, Y.  
609 (2007). A virus causes cancer by inducing massive chromosomal instability through cell  
610 fusion. *Curr Biol* 17, 431-437.
- 611 Duxin, J.P., Dewar, J.M., Yardimci, H., and Walter, J.C. (2014). Repair of a DNA-protein  
612 crosslink by replication-coupled proteolysis. *Cell* 159, 346-357.
- 613 El Achkar, E., Gerbault-Seureau, M., Muleris, M., Dutrillaux, B., and Debatisse, M.  
614 (2005). Premature condensation induces breaks at the interface of early and late  
615 replicating chromosome bands bearing common fragile sites. *Proc Natl Acad Sci U S A*  
616 102, 18069-18074.
- 617 Eykelenboom, J.K., Harte, E.C., Canavan, L., Pastor-Peidro, A., Calvo-Asensio, I.,  
618 Llorens-Agost, M., and Lowndes, N.F. (2013). ATR activates the S-M checkpoint during  
619 unperturbed growth to ensure sufficient replication prior to mitotic onset. *Cell Rep* 5,  
620 1095-1107.
- 621 Feng, W., Guo, Y., Huang, J., Deng, Y., Zang, J., and Huen, M.S. (2016). TRAP  
622 regulates replication fork recovery and progression via PCNA. *Cell Discov* 2, 16016.
- 623 Fu, Y.V., Yardimci, H., Long, D.T., Ho, T.V., Guainazzi, A., Bermudez, V.P., Hurwitz, J.,  
624 van Oijen, A., Scharer, O.D., and Walter, J.C. (2011). Selective bypass of a lagging  
625 strand roadblock by the eukaryotic replicative DNA helicase. *Cell* 146, 931-941.
- 626 Fullbright, G., Rycenga, H.B., Gruber, J.D., and Long, D.T. (2016). p97 Promotes a  
627 Conserved Mechanism of Helicase Unloading during DNA Cross-Link Repair. *Mol Cell*  
628 *Biol* 36, 2983-2994.
- 629 Glover, T.W., Wilson, T.E., and Arlt, M.F. (2017). Fragile sites in cancer: more than  
630 meets the eye. *Nat Rev Cancer* 17, 489-501.
- 631 Graham, T.G., Walter, J.C., and Loparo, J.J. (2016). Two-Stage Synapsis of DNA Ends  
632 during Non-homologous End Joining. *Mol Cell* 61, 850-858.

- 633 Harley, M.E., Murina, O., Leitch, A., Higgs, M.R., Bicknell, L.S., Yigit, G., Blackford, A.N.,  
634 Zlatanou, A., Mackenzie, K.J., Reddy, K., *et al.* (2016). TRAIIP promotes DNA damage  
635 response during genome replication and is mutated in primordial dwarfism. *Nat Genet*  
636 *48*, 36-43.
- 637 Harrigan, J.A., Belotserkovskaya, R., Coates, J., Dimitrova, D.S., Polo, S.E., Bradshaw,  
638 C.R., Fraser, P., and Jackson, S.P. (2011). Replication stress induces 53BP1-  
639 containing OPT domains in G1 cells. *J Cell Biol* *193*, 97-108.
- 640 Hendrickson, M., Madine, M., Dalton, S., and Gautier, J. (1996). Phosphorylation of  
641 MCM4 by cdc2 protein kinase inhibits the activity of the minichromosome maintenance  
642 complex. *Proc Natl Acad Sci U S A* *93*, 12223-12228.
- 643 Hills, S.A., and Diffley, J.F. (2014). DNA replication and oncogene-induced replicative  
644 stress. *Curr Biol* *24*, R435-444.
- 645 Hoffmann, S., Smedegaard, S., Nakamura, K., Mortuza, G.B., Raschle, M., Ibanez de  
646 Opakua, A., Oka, Y., Feng, Y., Blanco, F.J., Mann, M., *et al.* (2016). TRAIIP is a PCNA-  
647 binding ubiquitin ligase that protects genome stability after replication stress. *J Cell Biol*  
648 *212*, 63-75.
- 649 Holland, A.J., and Cleveland, D.W. (2012). Chromoanagenesis and cancer:  
650 mechanisms and consequences of localized, complex chromosomal rearrangements.  
651 *Nat Med* *18*, 1630-1638.
- 652 Hustedt, N., and Durocher, D. (2016). The control of DNA repair by the cell cycle. *Nat*  
653 *Cell Biol* *19*, 1-9.
- 654 Johnson, R.T., and Rao, P.N. (1970). Mammalian cell fusion: induction of premature  
655 chromosome condensation in interphase nuclei. *Nature* *226*, 717-722.
- 656 Kato, H., and Sandberg, A.A. (1968). Chromosome pulverization in human cells with  
657 micronuclei. *J Natl Cancer Inst* *40*, 165-179.
- 658 Klein Douwel, D., Boonen, R.A., Long, D.T., Szybowska, A.A., Raschle, M., Walter, J.C.,  
659 and Knipscheer, P. (2014). XPF-ERCC1 acts in Unhooking DNA interstrand crosslinks  
660 in cooperation with FANCD2 and FANCP/SLX4. *Mol Cell* *54*, 460-471.
- 661 Knipscheer, P., Raschle, M., Smogorzewska, A., Enoiu, M., Ho, T.V., Scharer, O.D.,  
662 Elledge, S.J., and Walter, J.C. (2009). The Fanconi anemia pathway promotes  
663 replication-dependent DNA interstrand cross-link repair. *Science* *326*, 1698-1701.
- 664 Lebofsky, R., Takahashi, T., and Walter, J.C. (2009). DNA replication in nucleus-free  
665 *Xenopus* egg extracts. *Methods Mol Biol* *521*, 229-252.
- 666 Leibowitz, M.L., Zhang, C.Z., and Pellman, D. (2015). Chromothripsis: A New  
667 Mechanism for Rapid Karyotype Evolution. *Annu Rev Genet* *49*, 183-211.

- 668 Liu, P., Erez, A., Nagamani, S.C., Dhar, S.U., Kolodziejska, K.E., Dharmadhikari, A.V.,  
669 Cooper, M.L., Wiszniewska, J., Zhang, F., Withers, M.A., *et al.* (2011). Chromosome  
670 catastrophes involve replication mechanisms generating complex genomic  
671 rearrangements. *Cell* *146*, 889-903.
- 672 Long, D.T., Joukov, V., Budzowska, M., and Walter, J.C. (2014). BRCA1 promotes  
673 unloading of the CMG helicase from a stalled DNA replication fork. *Mol Cell* *56*, 174-185.
- 674 Long, D.T., Raschle, M., Joukov, V., and Walter, J.C. (2011). Mechanism of RAD51-  
675 dependent DNA interstrand cross-link repair. *Science* *333*, 84-87.
- 676 Luciani, M.G., Oehlmann, M., and Blow, J.J. (2004). Characterization of a novel ATR-  
677 dependent, Chk1-independent, intra-S-phase checkpoint that suppresses initiation of  
678 replication in *Xenopus*. *J Cell Sci* *117*, 6019-6030.
- 679 Lukas, C., Savic, V., Bekker-Jensen, S., Doil, C., Neumann, B., Pedersen, R.S., Grofte,  
680 M., Chan, K.L., Hickson, I.D., Bartek, J., *et al.* (2011). 53BP1 nuclear bodies form  
681 around DNA lesions generated by mitotic transmission of chromosomes under  
682 replication stress. *Nat Cell Biol* *13*, 243-253.
- 683 Ly, P., Teitz, L.S., Kim, D.H., Shoshani, O., Skaletsky, H., Fachinetti, D., Page, D.C.,  
684 and Cleveland, D.W. (2017). Selective Y centromere inactivation triggers chromosome  
685 shattering in micronuclei and repair by non-homologous end joining. *Nat Cell Biol* *19*,  
686 68-75.
- 687 Mankouri, H.W., Huttner, D., and Hickson, I.D. (2013). How unfinished business from S-  
688 phase affects mitosis and beyond. *EMBO J* *32*, 2661-2671.
- 689 Minocherhomji, S., Ying, S., Bjerregaard, V.A., Bursomanno, S., Aleliunaite, A., Wu, W.,  
690 Mankouri, H.W., Shen, H., Liu, Y., and Hickson, I.D. (2015). Replication stress activates  
691 DNA repair synthesis in mitosis. *Nature*.
- 692 Naim, V., Wilhelm, T., Debatisse, M., and Rosselli, F. (2013). ERCC1 and MUS81-  
693 EME1 promote sister chromatid separation by processing late replication intermediates  
694 at common fragile sites during mitosis. *Nat Cell Biol* *15*, 1008-1015.
- 695 Ochs, F., Somyajit, K., Altmeyer, M., Rask, M.B., Lukas, J., and Lukas, C. (2016).  
696 53BP1 fosters fidelity of homology-directed DNA repair. *Nat Struct Mol Biol* *23*, 714-721.
- 697 Pasero, P., and Vindigni, A. (2017). Nucleases Acting at Stalled Forks: How to Reboot  
698 the Replication Program with a Few Shortcuts. *Annu Rev Genet* *51*, 477-499.
- 699 Peterson, S.E., Li, Y., Chait, B.T., Gottesman, M.E., Baer, R., and Gautier, J. (2011).  
700 Cdk1 uncouples CtIP-dependent resection and Rad51 filament formation during M-  
701 phase double-strand break repair. *J Cell Biol* *194*, 705-720.
- 702 Prokhorova, T.A., Mowrer, K., Gilbert, C.H., and Walter, J.C. (2003). DNA replication of  
703 mitotic chromatin in *Xenopus* egg extracts. *Proc Natl Acad Sci U S A* *100*, 13241-13246.



- 704 Ragland, R.L., Patel, S., Rivard, R.S., Smith, K., Peters, A.A., Bielinsky, A.K., and  
705 Brown, E.J. (2013). RNF4 and PLK1 are required for replication fork collapse in ATR-  
706 deficient cells. *Genes Dev* 27, 2259-2273.
- 707 Rao, P.N., Johnson, R.T., and Sperling, K. (1982). *Premature Chromosome  
708 Condensation: Application in Basic, Clinical, and Mutation Research* (New York,  
709 Academic Press).
- 710 Raschle, M., Knipscheer, P., Enoiu, M., Angelov, T., Sun, J., Griffith, J.D., Ellenberger,  
711 T.E., Scharer, O.D., and Walter, J.C. (2008). Mechanism of replication-coupled DNA  
712 interstrand crosslink repair. *Cell* 134, 969-980.
- 713 Raschle, M., Smeenk, G., Hansen, R.K., Temu, T., Oka, Y., Hein, M.Y., Nagaraj, N.,  
714 Long, D.T., Walter, J.C., Hofmann, K., *et al.* (2015). DNA repair. Proteomics reveals  
715 dynamic assembly of repair complexes during bypass of DNA cross-links. *Science* 348,  
716 1253671.
- 717 Ruiz, S., Mayor-Ruiz, C., Lafarga, V., Murga, M., Vega-Sendino, M., Ortega, S., and  
718 Fernandez-Capetillo, O. (2016). A Genome-wide CRISPR Screen Identifies CDC25A as  
719 a Determinant of Sensitivity to ATR Inhibitors. *Mol Cell* 62, 307-313.
- 720 Saldivar, J.C., Cortez, D., and Cimprich, K.A. (2017). The essential kinase ATR:  
721 ensuring faithful duplication of a challenging genome. *Nat Rev Mol Cell Biol* 18, 622-636.
- 722 Semlow, D.R., Zhang, J., Budzowska, M., Drohat, A.C., and Walter, J.C. (2016).  
723 Replication-Dependent Unhooking of DNA Interstrand Cross-Links by the NEIL3  
724 Glycosylase. *Cell* 167, 498-511 e414.
- 725 Sonnevile, R., Moreno, S.P., Knebel, A., Johnson, C., Hastie, C.J., Gartner, A.,  
726 Gambus, A., and Labib, K. (2017). CUL-2LRR-1 and UBXN-3 drive replisome  
727 disassembly during DNA replication termination and mitosis. *Nat Cell Biol* 19, 468-479.
- 728 Soo Lee, N., Jin Chung, H., Kim, H.J., Yun Lee, S., Ji, J.H., Seo, Y., Hun Han, S., Choi,  
729 M., Yun, M., Lee, S.G., *et al.* (2016). TRAIP/RNF206 is required for recruitment of  
730 RAP80 to sites of DNA damage. *Nat Commun* 7, 10463.
- 731 Stephens, P.J., Greenman, C.D., Fu, B., Yang, F., Bignell, G.R., Mudie, L.J., Pleasance,  
732 E.D., Lau, K.W., Beare, D., Stebbings, L.A., *et al.* (2011). Massive genomic  
733 rearrangement acquired in a single catastrophic event during cancer development. *Cell*  
734 144, 27-40.
- 735 Techer, H., Koundrioukoff, S., Nicolas, A., and Debatisse, M. (2017). The impact of  
736 replication stress on replication dynamics and DNA damage in vertebrate cells. *Nat Rev*  
737 *Genet* 18, 535-550.
- 738 Toledo, L., Neelsen, K.J., and Lukas, J. (2017). Replication Catastrophe: When a  
739 Checkpoint Fails because of Exhaustion. *Mol Cell* 66, 735-749.



- 740 Toledo, L.I., Altmeyer, M., Rask, M.B., Lukas, C., Larsen, D.H., Povlsen, L.K., Bekker-  
741 Jensen, S., Mailand, N., Bartek, J., and Lukas, J. (2013). ATR prohibits replication  
742 catastrophe by preventing global exhaustion of RPA. *Cell* 155, 1088-1103.
- 743 Walter, J., and Newport, J. (2000). Initiation of eukaryotic DNA replication: origin  
744 unwinding and sequential chromatin association of Cdc45, RPA, and DNA polymerase  
745 alpha. *Mol Cell* 5, 617-627.
- 746 Walter, J., Sun, L., and Newport, J. (1998). Regulated chromosomal DNA replication in  
747 the absence of a nucleus. *Mol Cell* 1, 519-529.
- 748 West, S.C., and Chan, Y.W. (2018). Genome Instability as a Consequence of Defects in  
749 the Resolution of Recombination Intermediates. *Cold Spring Harb Symp Quant Biol*.
- 750 Wyatt, D.W., Feng, W., Conlin, M.P., Yousefzadeh, M.J., Roberts, S.A., Mieczkowski, P.,  
751 Wood, R.D., Gupta, G.P., and Ramsden, D.A. (2016). Essential Roles for Polymerase  
752 theta-Mediated End Joining in the Repair of Chromosome Breaks. *Mol Cell* 63, 662-673.
- 753 Ying, S., Minocherhomji, S., Chan, K.L., Palmai-Pallag, T., Chu, W.K., Wass, T.,  
754 Mankouri, H.W., Liu, Y., and Hickson, I.D. (2013). MUS81 promotes common fragile site  
755 expression. *Nat Cell Biol* 15, 1001-1007.
- 756

757 **FIGURE LEGENDS**

758 **Figure 1. Mitotic CDK triggers aberrant processing of stalled DNA replication**  
759 **forks in *Xenopus* egg extracts**

760 **(A)** Schematic of experimental approach to test effect of B1-CDK1 on DNA replication.  
761 APH, DNA polymerase inhibitor aphidicolin.

762 **(B)** A 3 kb pBlueScript plasmid was replicated according to (A) and products were  
763 separated on a native agarose gel followed by autoradiography. Unless stated  
764 otherwise, the '0 minute' time point refers to NPE addition.

765 **(C)** Schematic of DNA replication for LacR-bound p[*lacO*<sub>48</sub>] plasmid.

766 **(D)** p[*lacO*<sub>48</sub>] was replicated according to (C) under the indicated conditions.

767 **(E)** p[*lacO*<sub>48</sub>] was replicated according to (C) in the presence of LacR and/or IPTG (10  
768 mM, 15 min incubation in NPE before mixing with "licensing" mixture), as indicated.

769 **(F)** Schematic of replication for pDPC, containing four 46 kDa M.HpaII DNA  
770 methyltransferases at the indicated positions. Products formed in the presence and  
771 absence of B1-CDK1 are indicated.

772 **(G)** pControl or pDPC was replicated according to (F) using the indicated conditions.

773 From (A) to (G), B1-CDK1 was added to "licensing" mixture at a concentration of 50  
774 ng/μL and its final concentration in the overall reaction is 16.7 ng/μL. RI, replication  
775 intermediate; OC, open circle; SC: supercoil; θ, theta structure; ARP, aberrant  
776 replication product.

777 See also **Figure S1**.

778

779 **Figure 2. Mitotic processing of stalled replication forks leads to complex DNA**  
780 **rearrangements**

781 (A) Structure of the 4.6 kb p[*lacO*<sub>48</sub>] plasmid. Numbers mark the length of the indicated  
782 DNA segments in kilo-basepairs (kb).

783 (B) p[*lacO*<sub>48</sub>] was replicated in the presence of Buffer or B1-CDK1. At the indicated time  
784 points, replication products were isolated and digested with AlwNI and AflII, or AlwNI, as  
785 indicated. Numbers label the size of linear fragments in kb; Y, double-Y or single-Y  
786 structure (see panel C).

787 (C) Model explaining the restriction products observed in (B). Although the model favor  
788 the fork breakage on the leading strand, the possibility of fork breakage on the lagging  
789 strand has not been excluded. A more detailed model is in Figure S2A.

790 (D) The smear of ~3-4 kb mitotic DNA replication products generated after AlwNI  
791 digestion in (B) was self-ligated, cloned and sequenced. The controls are replication  
792 products of the same plasmid from a mitotic reaction lacking LacR. The *lacO* repeats,  
793 shown as white boxes, are separated by four unique spacers shown in different colors.  
794 Inset, DNA sequences of the *lacO* repeat and four spacers. The detailed structure of the  
795 entire *lacO* array is shown in Figure S2C.

796 (E) A model for the generation of product h in (D) from multiple template-switching  
797 events.

798 See also **Figure S2**.

799

800 **Figure 3. Depletion of DNA polymerase  $\theta$  disrupts the generation of aberrant**  
801 **replication product in mitosis**

802 (A) Mock-depleted and Pol $\theta$ -depleted *Xenopus* egg extracts were blotted for Pol $\theta$  and  
803 MCM7, alongside a serial dilution of mock-depleted extracts. Asterisk, background  
804 band.

805 (B) LacR-bound p[*lacO*<sub>48</sub>] was replicated in mock-depleted or Pol $\theta$ -depleted extracts  
806 with or without B1-CDK1 treatment. Overall DNA replication and ARP were quantified in  
807 Figure S3F.

808 (C) pDPC was replicated in mock-depleted or Pol $\theta$ -depleted egg extracts with or without  
809 B1-CDK1 treatment. Overall DNA replication and ARP were quantified in Figure S3G.

810 In (B) and (C), OC, open circle; SC, supercoil;  $\theta$ , theta structure; ARP, aberrant  
811 replication product.

812 See also **Figure S3**.

813

#### 814 **Figure 4. Mitotic replication fork collapse requires p97-dependent CMG unloading**

815 (A) LacR-bound p[*lacO*<sub>48</sub>] was replicated in mock-depleted or condensin SMC2-  
816 depleted extracts with or without B1-CDK1 treatment.

817 (B) LacR-bound p[*lacO*<sub>48</sub>] plasmid was replicated and treated as schemed. Chromatin-  
818 bound proteins were recovered and blotted with the indicated antibodies. Red bracket,  
819 ubiquitylated MCM7. Histone H3 served as a loading control. Note that the MCM7  
820 antibody cross-reacts with USP21.

821 (C) LacR-bound p[*lacO*<sub>48</sub>] was replicated in the presence or absence of p97-i and B1-  
822 CDK1, as indicated.

823 (D) pDPC was replicated in the presence or absence of p97-i and B1-CDK1, as  
824 indicated. ARP, OC+SC and overall DNA replication were quantified in Figure S4E.

825 In (A), (C) and (D), OC, open circle; SC: supercoil;  $\theta$ , theta structure; ARP, aberrant  
826 replication product.

827 See also **Figure S4**.

828

829 **Figure 5. E3 ubiquitin ligase TRAIIP promotes mitotic CMG unloading from a**  
830 **stalled replication fork**

831 **(A)** Mock-depleted and TRAIIP-depleted egg extracts were blotted for TRAIIP and  
832 MCM7 alongside a serial dilution of mock-depleted extracts.

833 **(B)** LacR-bound p[*lacO*<sub>48</sub>] plasmid was replicated in mock-depleted or TRAIIP-depleted  
834 egg extracts and treated as schemed. Chromatin-bound proteins were recovered and  
835 blotted with the indicated antibodies.

836 **(C)** LacR-bound p[*lacO*<sub>48</sub>] was replicated in mock-depleted or TRAIIP-depleted extracts  
837 with or without B1-CDK1 treatment.

838 **(D)** LacR-bound p[*lacO*<sub>48</sub>] was replicated in mitotic mock-depleted or TRAIIP-depleted  
839 egg extracts with or without recombinant rTRAIIP<sup>WT</sup> or rTRAIIP<sup>R18C</sup>, as indicated.  
840 rTRAIIP<sup>WT</sup> and rTRAIIP<sup>R18C</sup> were added to NPE at a concentration of 21 ng/ $\mu$ L (~7-fold of  
841 endogenous TRAIIP, see assessment in Figure S5C). Matched buffer was added to  
842 reactions without recombinant protein. Note that addition of rTRAIIP<sup>WT</sup> at endogenous  
843 level into TRAIIP-depleted extracts also strongly rescued mitotic ARPs, see Figures S5D  
844 and S5E.

845 **(E)** LacR-bound p[*lacO*<sub>48</sub>] was replicated in mock-depleted or TRAIIP-depleted mitotic  
846 egg extracts with DMSO or p97-i treatment.

847 See also **Figure S5**.

848

849 **Figure 6. TRAIP mediates unloading of terminated CMGs in mitosis**

850 (A) p[*lacO*<sub>48</sub>] plasmid, in the absence of LacR, was replicated and treated as schemed.  
851 Chromatin-bound proteins were recovered and blotted with the indicated antibodies.  
852 Red brackets indicate the levels of MCM7 ubiquitylation.

853 (B) p[*lacO*<sub>48</sub>] plasmid, in the absence of LacR, was replicated in mock-depleted or  
854 TRAIP-depleted egg extracts supplemented with or without rTRAIP<sup>WT</sup> (~4-fold of  
855 endogenous TRAIP), or rTRAIP<sup>R18C</sup> (~9-fold of endogenous TRAIP), followed by  
856 indicated treatments. Chromatin-bound proteins were recovered and blotted with the  
857 indicated antibodies. Red bracket indicate the level of MCM7 ubiquitylation.

858 See also **Figure S6**.

859

860 **Figure 7. Model of CMG unloading, fork breakage and complex DNA**  
861 **rearrangements upon premature mitotic entry**

862 When a replication fork encounters a replication barrier (indicated as a red hexagonal  
863 STOP sign), the replisome containing CMG and TRAIP is stably stalled during  
864 interphase. Upon mitotic entry, E3 ubiquitin ligase TRAIP is activated (directly or  
865 indirectly) to cause CMG ubiquitylation on MCM7 subunit, which in turn triggers CMG  
866 extraction/unloading from chromatin by CDC48/p97 ATPase. Loss of CMG leads to  
867 incision by so far unknown DNA nuclease(s), followed by error-prone DSB repair by  
868 MMEJ and/or SSA, which results in complex DNA rearrangements such as deletions  
869 and insertions from template-switching events.

870

871

872 **METHODS**

873 No statistical methods were used to predetermine sample size. All experiments were  
874 performed at least twice independently using separate preparations of *Xenopus* egg  
875 extracts. A representative result is shown.

876

877 **Protein purification.** To purify biotinylated LacR, the LacR-Avi expressing plasmid  
878 pET11a[LacR-Avi] (Avidity, Denver, CO) and biotin ligase expressing plasmid pBirAcm  
879 (Avidity, Denver, CO) were co-transformed into T7 Express cells (New England  
880 Biolabs). Cultures were supplemented with 50 mM biotin (Research Organics,  
881 Cleveland, OH). Expression of LacR-Avi and the biotin ligase was induced by addition  
882 of IPTG (Isopropyl  $\beta$ -D-thiogalactoside, Sigma, St. Louis, MO) to a final concentration of  
883 1 mM. Biotinylated LacR-Avi was then purified as described (Dewar et al., 2015). BRC  
884 (a ~35 amino acid peptide derived from BRCA2 that binds RAD51) and BRC\*\*\* (BRC  
885 peptide with mutations at RAD51 binding sites), a gift of K. Vrtis, were purified as  
886 reported (Long et al., 2011). rTRAIP and rTRAIP-R18C were expressed from a 6xHis-  
887 SUMO plasmid in bacteria and purified as described (Wu et al. submitted). Other  
888 proteins used in this study were Cyclin B1-CDK1 (Life Technologies Cat #PR4768C and  
889 EMD Millipore Cat #14-450M) and Cyclin E-CDK2 (EMD Millipore Cat #14-475). USP21  
890 was a gift from D. Finley.

891

892 **DNA constructs.** The 4.6 kb p[*lacO*<sub>48</sub>] plasmid (a generous gift of K. Vrtis) contains an  
893 array of 48 *lacO* sites which can be bound by the *lac* repressor (LacR) to form  
894 replication barriers. The pDPC plasmid (4.3 kb), a generous gift of J. Sparks, was

895 constructed based on a previous protocol (Duxin et al., 2014). Control plasmid (pControl)  
896 used in Figure 1G has the same DNA sequence as pDPC, but lacks crosslinks.

897

898 ***Xenopus* egg extracts and DNA replication.** Egg extracts were prepared using  
899 *Xenopus laevis* (Nasco Cat #LM0053MX). All experiments involving animals were  
900 approved by the Harvard Medical School Institutional Animal Care and use Committee  
901 (IACUC) and conform to relevant regulatory standards. *Xenopus* egg extracts including  
902 Low Speed Supernatant (LSS), High Speed Supernatant (HSS), and Nucleoplasmic  
903 egg extract (NPE) were prepared as described (Blow and Laskey, 1986; Lebofsky et al.,  
904 2009).

905 To assess the effects of mitotic cyclins, demembranated sperm chromatin from  
906 *Xenopus laevis* males was incubated in LSS (4,000 sperms/ $\mu$ L LSS) for 40 minutes at  
907 room temperature to form nuclei. The reactions were subsequently incubated with a  
908 range of concentrations of mitotic B1-CDK1. Nuclear envelope integrity and chromatin  
909 condensation were monitored by microscopy after Hoechst staining (see below). The  
910 concentration (50 ng/ $\mu$ L) that triggered nuclear envelopment breakdown and  
911 chromosome condensation was chosen to trigger mitotic entry in subsequent  
912 experiments.

913 For interphase DNA replication, sperm chromatin or plasmid DNA was first  
914 incubated in HSS (final concentration of 7.5-15.0 ng DNA/ $\mu$ L HSS) for 30 minutes at  
915 room temperature to license the DNA for replication (“licensing”), followed by the  
916 addition of 2 volumes of NPE to initiate CDK2-dependent replication. To radiolabel the  
917 nascent strands during replication, NPE was supplemented with trace amounts of [ $\alpha$ -



918 <sup>32</sup>P]-dATP. Mitotic DNA replication was performed essentially as described (Prokhorova  
919 et al., 2003). Briefly, after 30 minutes, 0.9 volumes of licensing reaction was incubated  
920 with 0.1 volumes of mitotic B1-CDK1 for 30 minutes at room temperature, followed by  
921 addition of 2 volumes of NPE. In the “licensing” mixture, the concentration of B1-CDK1  
922 was 50 ng/μL, and its concentration in the final replication reaction was 16.7 ng/μL.  
923 Unless stated otherwise, the ‘0 minute’ time point refers to the moment of NPE addition.  
924 2 μL aliquots of replication reaction were stopped with 5 μl of stop solution A (5% SDS,  
925 80 mM Tris pH8.0, 0.13% phosphoric acid, 10% Ficoll) supplemented with 1 μl 20  
926 mg/ml Proteinase K (Roche, Nutley, NJ). Samples were incubated for 1 hour at 37°C  
927 prior to electrophoresis on a 0.9% native agarose gel. Gels were dried and radioactivity  
928 was detected using a phosphorimager (Lebofsky et al., 2009).

929 To induce replication fork stalling using LacR, one volume of p[*lacO*<sub>48</sub>] (200  
930 ng/μL) was incubated with one volume of recombinant LacR (36 μM) for 45-60 minutes  
931 at room temperature. Next, 0.1 volumes of the mixture was combined with 0.9 volumes  
932 of HSS for licensing, followed by addition of 2 volumes of NPE for initiation of  
933 replication. To inhibit the binding of LacR to the *lacO* array, IPTG was added to NPE to  
934 a final concentration of 10 mM and incubated for 15 minutes prior to use in replication  
935 (Figure 1E) or added into replication reactions after fork stalling (Figure 4G) at the  
936 indicated time.

937 For replication assays with inhibitors, NPE was supplemented with inhibitors for  
938 15 minutes at room temperature before addition to the licensing mixture. Inhibitors were  
939 used at the following final concentrations in replication reaction: Aphidicolin (Sigma Cat  
940 #A0781-5MG), 2.2 μM or 0.97 μM, as indicated; CDC7 inhibitor PHA-767491 (Sigma

941 Cat #PZ0178), 266  $\mu$ M; p97 inhibitor NMS-873 (Sigma Cat #SML1128-5MG), 266  $\mu$ M;  
942 DNA-PKcs inhibitor NU-7441, 133  $\mu$ M; BRC or BRC<sup>\*\*\*</sup>, 1  $\mu$ g/ $\mu$ L; Cullin inhibitor MLN-  
943 4924 (Active Biochem Cat #A-1139), 266  $\mu$ M. For the Cdk1 inhibition assay in Figure  
944 S2B, CDK1 inhibitor RO-3306 (EMD Millipore Cat #217699-5MG) was incubated with  
945 the replication reaction containing stalled replication forks for 5 minutes before the  
946 addition of B1-CDK1.

947

948 **Immunodepletion and Western blotting.** Immunodepletions using antibodies against  
949 *Xenopus laevis* FANCD2 (Knipscheer et al., 2009), FANCI (Duxin et al., 2014), SMC2  
950 (antigen: Ac-CSKTKERRNRMEVDK-OH, New England Peptide), TRAIIP (antigen: Ac-  
951 CTSSLANQPRLEDFLK-OH, New England Peptide), Pol $\theta$  (antigen: residues 1212 to  
952 1506, Abgent), and RAD51 (Long et al., 2011) were performed as described previously  
953 (Budzowska et al., 2015). Briefly, Protein A Sepharose Fast Flow beads (GE  
954 Healthcare) were incubated with antibodies at 4°C overnight. For mock depletion, an  
955 equivalent quantity of nonspecific rabbit IgGs was used. Five volumes of pre-cleared  
956 HSS or NPE were then mixed with one volume of the antibody-bound sepharose beads.  
957 For FANCI-D2 depletion of HSS and NPE, two rounds of depletion using both FANCI  
958 and FANCD2 antibodies were performed at room temperature for 20 minutes each.  
959 Depletions for other proteins were performed at 4°C, with two rounds for HSS and three  
960 rounds for NPE. For each round, a mixture of antibody-bound beads and egg extract  
961 was rotated on a wheel for 40 minutes. Immunodepleted extracts were collected and  
962 used immediately for DNA replication. Depletion efficiency was assessed by Western  
963 blotting. Western blots from depletion or plasmid/sperm chromatin pull-downs were

964 probed using antibodies against SMC2, TRAIIP, FANCI (Duxin et al., 2014), FANCD2  
965 (Knipscheer et al., 2009), MCM7 (Dewar et al., 2017), MCM6 (Dewar et al., 2017),  
966 RAD51 (Long et al., 2011), ORC2 (Dewar et al., 2017), CDC45 (Walter and Newport,  
967 2000), SLD5 (Dewar et al., 2017) and Histone H3 (Cell Signaling Technology #9715S).

968

969 **Sperm chromatin spin-down assay.** Sperm chromatin spin-down was performed as  
970 previously described (Raschle et al., 2015). Briefly, chromatin and associated proteins  
971 were isolated by centrifugation through a sucrose cushion, washed three times,  
972 resuspended in 2x SDS sample buffer (100 mM Tris pH 6.8, 4% SDS, 0.2%  
973 bromophenol blue, 20% glycerol, 10%  $\beta$ -mercaptoethanol) and boiled at 95°C for 3-5  
974 minutes. In Figure S3A, chromatin was spun down 20 minutes after NPE addition for the  
975 Buffer control and at 9 minutes after NPE addition for the B1-CDK1 treatment (final  
976 concentration, 16.7 ng/ $\mu$ L), at which point replication was ~50% complete for both  
977 reactions. In Figure S1D, chromatin and associated proteins were isolated from HSS.

978

979 **Plasmid pull-down assay.** Plasmid pull-down assays were performed as described  
980 (Budzowska et al., 2015). Briefly, streptavidin-coupled magnetic beads (Dynabeads M-  
981 280, Invitrogen; 6  $\mu$ l beads slurry per pull-down) were washed three times with wash  
982 buffer 1 (50 mM Tris pH 7.5, 150 mM NaCl, 1 mM EDTA pH 8, 0.02% Tween-20).  
983 Biotinylated LacR was incubated with the beads (12 pmol per 6  $\mu$ L beads) at room  
984 temperature for 40 min. The beads were then washed four times with pull-down buffer 1  
985 (10 mM Hepes pH 7.7, 50 mM KCl, 2.5 mM MgCl<sub>2</sub>, 250 mM sucrose, 0.25 mg/mL BSA,  
986 0.02% Tween-20) and resuspended in 40  $\mu$ L of the same buffer. At the indicated times,

987 4  $\mu$ L samples of the replication reaction were withdrawn and gently mixed with Biotin-  
988 LacR-coated beads. The suspension was immediately placed on a rotating wheel and  
989 incubated for 30-60 minutes at 4°C. The beads were washed three times with wash  
990 buffer 2 (10 mM Hepes pH 7.7, 50 mM KCl, 2.5 mM MgCl<sub>2</sub>, 0.25 mg/mL BSA, 0.03%  
991 Tween-20). The beads were resuspended in 40  $\mu$ L of 2 $\times$  SDS sample buffer and boiled  
992 at 95°C for 3-5 minutes. Chromatin-bound proteins were separated by SDS-PAGE and  
993 analyzed by Western blotting.

994

995 **De-ubiquitination assay.** Plasmid pull-downs were performed as described above,  
996 except that after the wash steps with wash buffer 2, chromatin-bound proteins were  
997 resuspended in 20  $\mu$ L of USP21 buffer (150 mM NaCl, 10 mM DTT, 50mM Tris pH 7.5)  
998 and split into two 10  $\mu$ L aliquots. Each aliquot was incubated with 1  $\mu$ L of the non-  
999 specific deubiquitinase USP21 or buffer at 37°C for 60 minutes. The reactions were  
1000 stopped by addition of 2x SDS sample buffer and boiled at 95°C for 3-5 minutes.

1001

1002 **Restriction digestion.** 2  $\mu$ L aliquots of replication reactions were stopped in 20  $\mu$ L of  
1003 stop solution B (50 mM Tris pH 7.5, 0.5% SDS, 25 mM EDTA), and replication products  
1004 were purified as previously described (Raschle et al., 2008). Purified products were  
1005 digested with restriction enzymes as *per* the manufacturer's instructions. Digestion  
1006 reactions were stopped in 0.5 volumes of stop solution C (5% SDS, 4 mg/mL Proteinase  
1007 K) and incubated for 60 minutes at room temperature. Digested products were  
1008 separated on a 1% native agarose gel and visualized by autoradiography.

1009

1010 **Sequencing.** LacR-bound p[*lacO*<sub>48</sub>] plasmid was replicated in the presence of mitotic  
1011 B1-CDK1 for 120 minutes. Replication products were purified and digested with AlwNI  
1012 (single cut on the parental DNA) for 60 minutes at 37°C, as described above. After  
1013 separation on a 0.9% native agarose gel, bands smaller than the 4.6 kb full-length linear  
1014 fragment were extracted and self-ligated with T4 DNA ligase. The ligation products were  
1015 transformed into *E.coli* DH5α. As a control, p[*lacO*<sub>48</sub>] was replicated without LacR for  
1016 120 minutes in the presence of B1-CDK1. Replication products (containing only open  
1017 circular and supercoiled species) were processed as above, and the only band (4.6 kb)  
1018 after AlwNI restriction was purified for cloning. Clones from both treatments were  
1019 sequenced by Sanger method with Forward primer: 5'-AAGGCGATTAAGTTGGGTAA-  
1020 3' and Reverse primer: 5'-CATGTTCTTTCCTGCGTTATCCCCTGA-3'.

1021  
1022 **Microscopy.** 1 μL of nuclear assembly reactions containing LSS egg extract and sperm  
1023 chromatin was mixed with 1 μL of Hoechst 3300 (2.5 μg/mL) for 5 minutes before  
1024 imaging. Images in Figures S1A and S1C were single focal planes acquired by a wide  
1025 field Nikon Eclipse E600 microscope equipped with a Nikon 40x Plan Apo NA 1.0 oil  
1026 objective. Images in Figure S4B were maximum projections from stacks of z-series  
1027 acquired with a 0.5 μm step size. Images were collected using a 60x Plan Apo NA 1.4  
1028 oil objective with a CoolSnapHQ2 CCD camera (Photometrics) on a Yokogawa CSU-22  
1029 spinning disk confocal system (Nikon Instruments, Melville, NY). Fluorophores were  
1030 excited by a 405 nm laser.

1031

1032 **Data quantification.** Autoradiographs and Western blots were quantified using ImageJ  
1033 1.48v (National Institute of Health). The quantification methods for individual results are  
1034 described in the figure legends.

1035

1036

## 1037 **SUPPLEMENTAL FIGURE LEGENDS**

### 1038 **Figure S1, related to Figure 1.**

1039 **(A)** To determine the concentration of mitotic B1-CDK1 that efficiently induces nuclear  
1040 envelope breakdown and chromatin condensation, de-membranated *Xenopus* sperm  
1041 chromatin was incubated in LSS (low speed supernatant) for 40 minutes to allow the  
1042 formation of pseudo nuclei. The indicated final concentrations of B1-CDK1 were then  
1043 added into the reactions for 30 minutes before Hoechst staining and imaging. 50 ng/ $\mu$ L  
1044 of B1-CDK1 was sufficient to induce nuclear envelope breakdown and chromatin  
1045 condensation and it was used for subsequent experiments unless otherwise indicated.  
1046 Scale bar, 10  $\mu$ m.

1047 **(B)** Percentage of intact nuclei remaining at the indicated time points after treatment  
1048 with the indicated concentration of B1-CDK1 ( $n > 1,000$ ). The '0 minute' time point refers  
1049 to Buffer or B1-CDK1 addition. The value at each time point was normalized to the  
1050 value at 0 minute in each treatment.

1051 **(C)** Chromatin condensation assay in membrane-free HSS. Sperm chromatin was  
1052 incubated in HSS for 30 minutes, and then treated with 50 ng/ $\mu$ L of B1-CDK1 for 30  
1053 minutes followed by Hoechst staining and imaging. Scale bar, 10  $\mu$ m.

1054 **(D)** Sperm chromatin spin-down assays in HSS. Sperm chromatin was incubated with  
1055 HSS for 30 minutes and treated with Buffer or 50 ng/μL of B1-CDK1 for another 30  
1056 minutes. Chromatin DNA was recovered and chromatin-bound proteins were blotted  
1057 with indicated antibodies. Unrelated lanes were cropped as indicated by the gap.

1058 **(E)** Plasmid pull-down assays in HSS. pBlueScript (3 kb) was incubated with HSS at a  
1059 concentration of 7.5 ng/μL for 30 minutes and treated with Buffer or 50 ng/μL of B1-  
1060 CDK1 for another 30 minutes. Plasmid was recovered and chromatin-bound proteins  
1061 were blotted with indicated antibodies. Unrelated lanes were cropped as indicated by  
1062 the gap.

1063 **(F)** Plasmid pull-down assay to assess origin firing. pBlueScript was incubated with HSS  
1064 for 30 minutes and treated with buffer or 50 ng/μL of B1-CDK1 for another 30 minutes  
1065 before addition of NPE. The p97 inhibitor NMS-873 (p97-i) was added into NPE (final  
1066 concentration, 266 μM) and incubated for 15 minutes. Treatment of p97-i blocked the  
1067 unloading of CMG helicases from chromatin and trapped ubiquitylated MCM7 on  
1068 chromatin, seen as a smear. Right panel shows the quantification of the CDC45 and  
1069 Histone H3 signals. Increased CDC45 loading with B1-CDK1 treatment suggested more  
1070 origin firing.

1071 **(G)** LacR-bound p[*lacO*<sub>48</sub>] was replicated in interphase egg extracts for 60 minutes and  
1072 then treated with DMSO or Cdk1 kinase inhibitor (CDK1-i, 333 μM RO-3306) for 5  
1073 minutes before the addition of Buffer or 50 ng/μL B1-CDK1. At the indicated times,  
1074 samples were withdrawn and replication products were tracked by electrophoresis and  
1075 autoradiography. ARP, aberrant replication product; θ, theta structure.

1076

1077 **Figure S2, related to Figure 2.**

1078 **(A)** Model for mitotic processing of replication forks stalled by *lacO*-LacR barriers,  
1079 explaining the restriction analysis (Figure 2B) and sequencing data (Figure 2D). After  
1080 replication fork stalling, B1-CDK1 induces fork collapse and double-strand breaks  
1081 (DSBs) at the edges of the *lacO* array. The broken DNA ends, with certain number of  
1082 *lacO* repeats, lead to either intra- or inter-molecular end joining. Inter-molecular end  
1083 joining generates the aberrant replication products (ARPs). The initial end joining  
1084 products can also be subject to cycles of fork collapse and end joining. Outcomes other  
1085 than those illustrated here are possible but may not be detected because our  
1086 sequencing strategy depends on the ability to recover plasmids by cloning. Although it  
1087 has not been addressed whether the leading or lagging strand templates break, the  
1088 results on CMG unloading described in Figure 7, as drawn (see below and text for  
1089 details) favor the leading strand breakage.

1090 **(B)** Schematic of B1-CDK1-induced fork breakage at different locations in the *lacO*  
1091 array. Breakage at the outer edges (left) and joining of the resulting one-ended breaks  
1092 creates large deletions of the array, whereas breakage closer to the midpoint of the  
1093 array causes smaller deletions (right).

1094 **(C)** Sequence and structure of the 48 *lacO* repeats in p[*lacO*<sub>48</sub>]. Each *lacO* repeat is  
1095 highlighted in yellow. Unique spacer sequences between *lacO* repeats are highlighted in  
1096 red, green, purple and blue, respectively, as depicted in Figures 2D and 2E. The  
1097 sequence in grey indicates a unique spacer in the middle of the *lacO* array. Sequencing  
1098 primers used in Figure 2D are indicated.

1099



1100 **Figure S3, related to Figure 3.**

1101 **(A)** B1-CDK1 treatment inhibits chromatin-loading of RAD51. Sperm chromatin was  
1102 replicated in egg extracts and sampled when 50% replication was completed (20  
1103 minutes for Buffer and 9 minutes for B1-CDK1). To inhibit DNA replication, CDC7  
1104 inhibitor (CDC7-i, 399  $\mu$ M of PHA-767491) was added to NPE and incubated for 15  
1105 minutes. Chromatin-bound proteins were recovered by chromatin spin-down and  
1106 detected by blotting with indicated antibodies.

1107 **(B)** Mock-depleted and RAD51-depleted egg extracts were blotted with RAD51 and  
1108 MCM7 antibodies. Serial dilutions of mock-depletion were used to assess the level of  
1109 RAD51 depletion. Arrowhead indicates RAD51.

1110 **(C)** LacR-bound p[*lacO*<sub>48</sub>] was replicated in mock-depleted or RAD51-depleted egg  
1111 extracts in the absence or presence of B1-CDK1.

1112 **(D)** pBlueScript was replicated in egg extracts with the indicated treatments. BRC  
1113 peptide binds and blocks RAD51's interaction with BRCA2, which prevents HR-  
1114 mediated DSB repair. BRC\*\*\* peptide harbors three mutations at RAD51 binding sites  
1115 and is unable to inhibit RAD51 (Long et al., 2011).

1116 **(E)** LacR-bound p[*lacO*<sub>48</sub>] was replicated with the indicated treatments. To inhibit NHEJ,  
1117 a DNA-PK inhibitor (DNA-PK-i, 133  $\mu$ M NU-7441) was added to NPE.

1118 **(F)** Quantification of overall DNA replication and ARP for Figure 3B.

1119 **(G)** Quantification of overall DNA replication and ARP for Figure 3C.

1120 In (C-E), ARP, aberrant replication product;  $\theta$ , theta structure; OC, open circle; SC,  
1121 supercoil; RI, replication intermediate.

1122

1123 **Figure S4, related to Figure 4.**

1124 **(A)** Mock-depleted and SMC2-depleted *Xenopus* egg extracts were blotted for SMC2  
1125 and MCM7 alongside a serial dilution of mock-depleted extracts.

1126 **(B)** Effect of SMC2 depletion on B1-CDK1-induced chromatin condensation in HSS.  
1127 Sperm chromatin was incubated in mock-depleted or SMC2-depleted HSS with Buffer  
1128 or B1-CDK1 for 30 minutes prior to Hoechst staining and imaging. Scale bar, 10  $\mu$ m.

1129 **(C)** pBlueScript was replicated in mock-depleted or SMC2-depleted egg extracts with a  
1130 low dose of aphidicolin in the absence or presence of B1-CDK1. The absence of SMC2  
1131 had no effect on mitotic ARP formation.

1132 **(D)** A time course to relate the timing of CMG unloading to replication fork collapse and  
1133 ARP formation during replication with B1-CDK1. LacR-bound p[*lacO*<sub>48</sub>] was replicated in  
1134 egg extracts for 30 minutes before the addition of Buffer or B1-CDK1. Plasmid pull-  
1135 downs were performed from “cold” reactions lacking radio-labeled nucleotides in parallel  
1136 with “hot” reactions containing [ $\alpha$ -<sup>32</sup>P]-dATP. Plasmid pull-down samples were blotted  
1137 for indicated proteins. Replication products were detected by autoradiography after gel  
1138 electrophoresis. The red bracket indicates ubiquitylated MCM7, which is detectable  
1139 before the appearance of the ARP. The black bracket marks potential collapsed  
1140 replication forks with the B1-CDK1 treatment.

1141 **(E)** Quantification of ARP, OC+SC, and overall DNA replication during replication of  
1142 pDPC in Figure 4D.

1143 In (C) and (D), RI, replication intermediate; ARP, aberrant replication product; OC, open  
1144 circle; SC, supercoil;  $\theta$ , theta structure.

1145

1146 **Figure S5, related to Figure 5.**

1147 **(A)** LacR-bound p[*lacO*<sub>48</sub>] was replicated and treated as schemed. Chromatin-bound  
1148 proteins were recovered and blotted with the indicated antibodies. IPTG was used to  
1149 release LacR from *lacO* array therefore induce replication termination. Cul-i was used to  
1150 inhibit CRL2<sup>Lrr1</sup>-dependent CMG ubiquitylation during interphase replication termination.

1151 **(B)** pDPC was replicated in mock-depleted or TRAIP-depleted egg extracts in the  
1152 presence or absence of B1-CDK1.

1153 **(C)** Serial dilutions of NPE and rTRAIP<sup>WT</sup> purified from *E. coli* were blotted with TRAIP  
1154 and MCM7 antibodies. Arrow head marks TRAIP signal and asterisk indicates a  
1155 background band in NPE. The concentration of TRAIP in NPE is 3.0-4.5 ng/μL.

1156 **(D)** LacR-bound p[*lacO*<sub>48</sub>] was replicated in mitotic mock-depleted or TRAIP-depleted  
1157 egg extracts with or without rTRAIP<sup>WT</sup> as indicated. rTRAIP<sup>WT</sup> was added to NPE at  
1158 endogenous level (3.6 ng/μL). Matched buffer was added to reactions without  
1159 rTRAIP<sup>WT</sup>.

1160 **(E)** pDPC was replicated in mitotic mock-depleted or TRAIP-depleted egg extracts with  
1161 or without rTRAIP<sup>WT</sup>, as indicated. rTRAIP<sup>WT</sup> was added to NPE at endogenous level  
1162 (3.6 ng/μL). Matched buffer was added to reactions without rTRAIP<sup>WT</sup>.

1163 **(F)** Mock-depleted and FANCI-D2-double depleted egg extracts were blotted with  
1164 indicated antibodies. Serial dilution of mock-depleted extract was used to assess the  
1165 level of FANCI-D2 depletion.

1166 **(G)** LacR-bound p[*lacO*<sub>48</sub>] was replicated in mock-depleted or FANCI-D2-depleted egg  
1167 extracts in the absence or presence of B1-CDK1. The depletion of FANCI-FANCD2 had  
1168 no effect on ARP formation.

1169 In (B), (D), (E) and (G), ARP, aberrant replication product;  $\theta$ , theta structure; OC, open  
1170 circle; SC, supercoil.

1171

1172 **Figure S6, related to Figure 6.**

1173 **(A)** p[*lacO*<sub>48</sub>], in the absence of LacR, was replicated in egg extracts used in Figures 6A  
1174 and 6B. DNA replication was complete in 20 minutes. RI, replication intermediate; OC,  
1175 open circle; SC, supercoil.

1176 **(B)** A 3.1 kb plasmid (pJD152 in (Dewar et al., 2015)) was replicated in mock-depleted  
1177 or TRAIP-depleted extracts in the presence or absence of p97-i (to trap terminated and  
1178 ubiquitylated CMGs on chromatin) followed by Buffer or B1-CDK1 treatment.  
1179 Chromatin-bound proteins were recovered and blotted with indicated antibodies. Red  
1180 brackets indicate the levels of MCM7 ubiquitylation. Note the dramatic smear of MCM7  
1181 ubiquitylation in the presence of B1-CDK1 in mock (compare lanes 6 and 2) and the  
1182 shrinkage with TRAIP depletion (compare lanes 14 and 6).

1183 **(C)** LacR-bound p[*lacO*<sub>48</sub>] plasmid was replicated in mock-depleted or TRAIP-depleted  
1184 egg extracts with or without recombinant rTRAIP<sup>WT</sup> (~4-fold of endogenous TRAIP), or  
1185 rTRAIP<sup>R18C</sup> (~9-fold of endogenous TRAIP), and treated as schemed. Chromatin-bound  
1186 proteins were recovered and blotted with the indicated antibodies.

1187 **(D)** Comparison of CMG unloading pathways. Mitotic CMG unloading at single stalled  
1188 fork (i) occurs when a single stalled CMG on ssDNA enters mitosis. TRAIP is activated  
1189 by mitotic CDK to trigger CMG ubiquitylation. Mitotic termination (ii) occurs when  
1190 CRL2<sup>Lrr1</sup> is deficient (Sonneville et al., 2017). CMGs at terminated replication forks are  
1191 ubiquitylated upon mitotic entry in a TRAIP-dependent manner. During interphase ICL

1192 repair (iii) (Wu et al., submitted), when two CMGs on ssDNA converge at ICL, TRAIIP is  
1193 activated, independent of CDK1 activity (data not shown) and promotes CMG  
1194 ubiquitylation. During replication termination in interphase (iv), two CMGs bypass each  
1195 other and translocate from ssDNA to dsDNA, triggering CRL2<sup>Lrr1</sup>-dependent CMG  
1196 ubiquitylation (Dewar et al., 2015; Dewar et al., 2017; Sonnevile et al., 2017). The  
1197 cartoons highlight the requirement of E3 ubiquitin ligase activity rather than physical  
1198 localization for CMG ubiquitylation. In contrast to CRL2<sup>Lrr1</sup> which is specifically recruited  
1199 to replisome during interphase replication termination, TRAIIP travels with the replisome.

1200

#### 1201 **Figure S7. Related to Figure 7**

1202 When replication forks stall on either side of a hard-to-replicate region (e.g. a common  
1203 fragile site), entry into mitosis causes CMG unloading and efficient fork breakage.  
1204 Because CMG binds the leading strand template, we propose that CMG unloading  
1205 leads to breakage of both stalled forks on the leading strand templates (left pathway).  
1206 One intact sister chromatid is rapidly restored by gap filling (dashed blue line). The other  
1207 chromatid is restored by alternative end joining of the two broken ends, yielding sister  
1208 chromatid exchange and a deletion that encompasses the segment of unreplicated  
1209 DNA. Template switching before end joining could generate duplications at the  
1210 breakpoint. In contrast, if stalled forks are broken randomly (right pathway),  
1211 unproductive outcomes will be frequent, including the formation of acentric and dicentric  
1212 isochromosomes (shown). Furthermore, if only one fork is broken, acentric arms can be  
1213 generated (not shown).

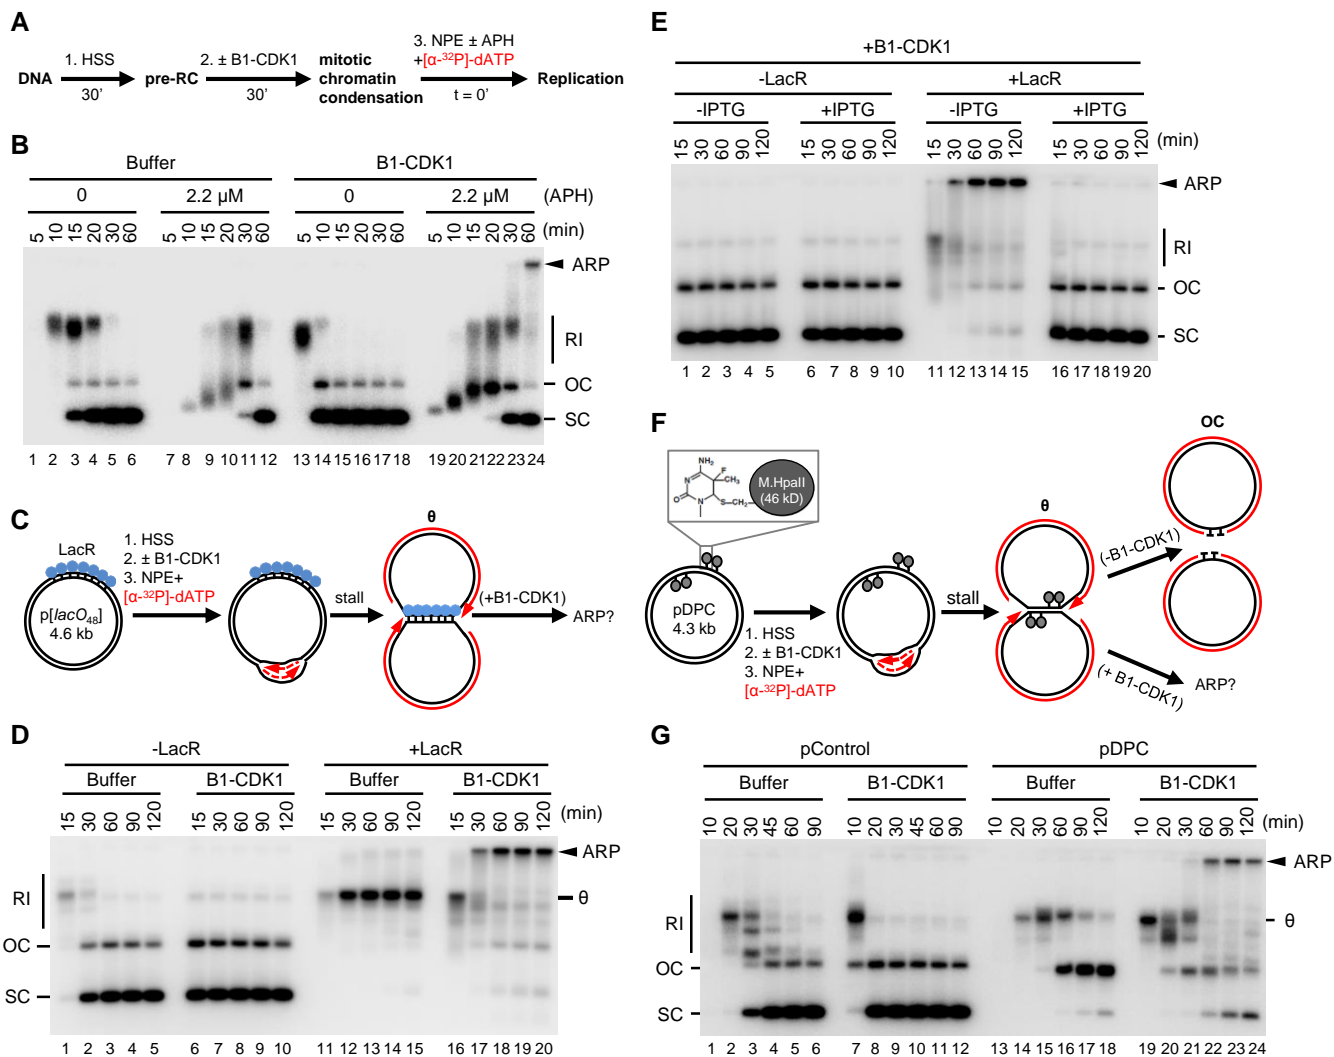

Figure 1

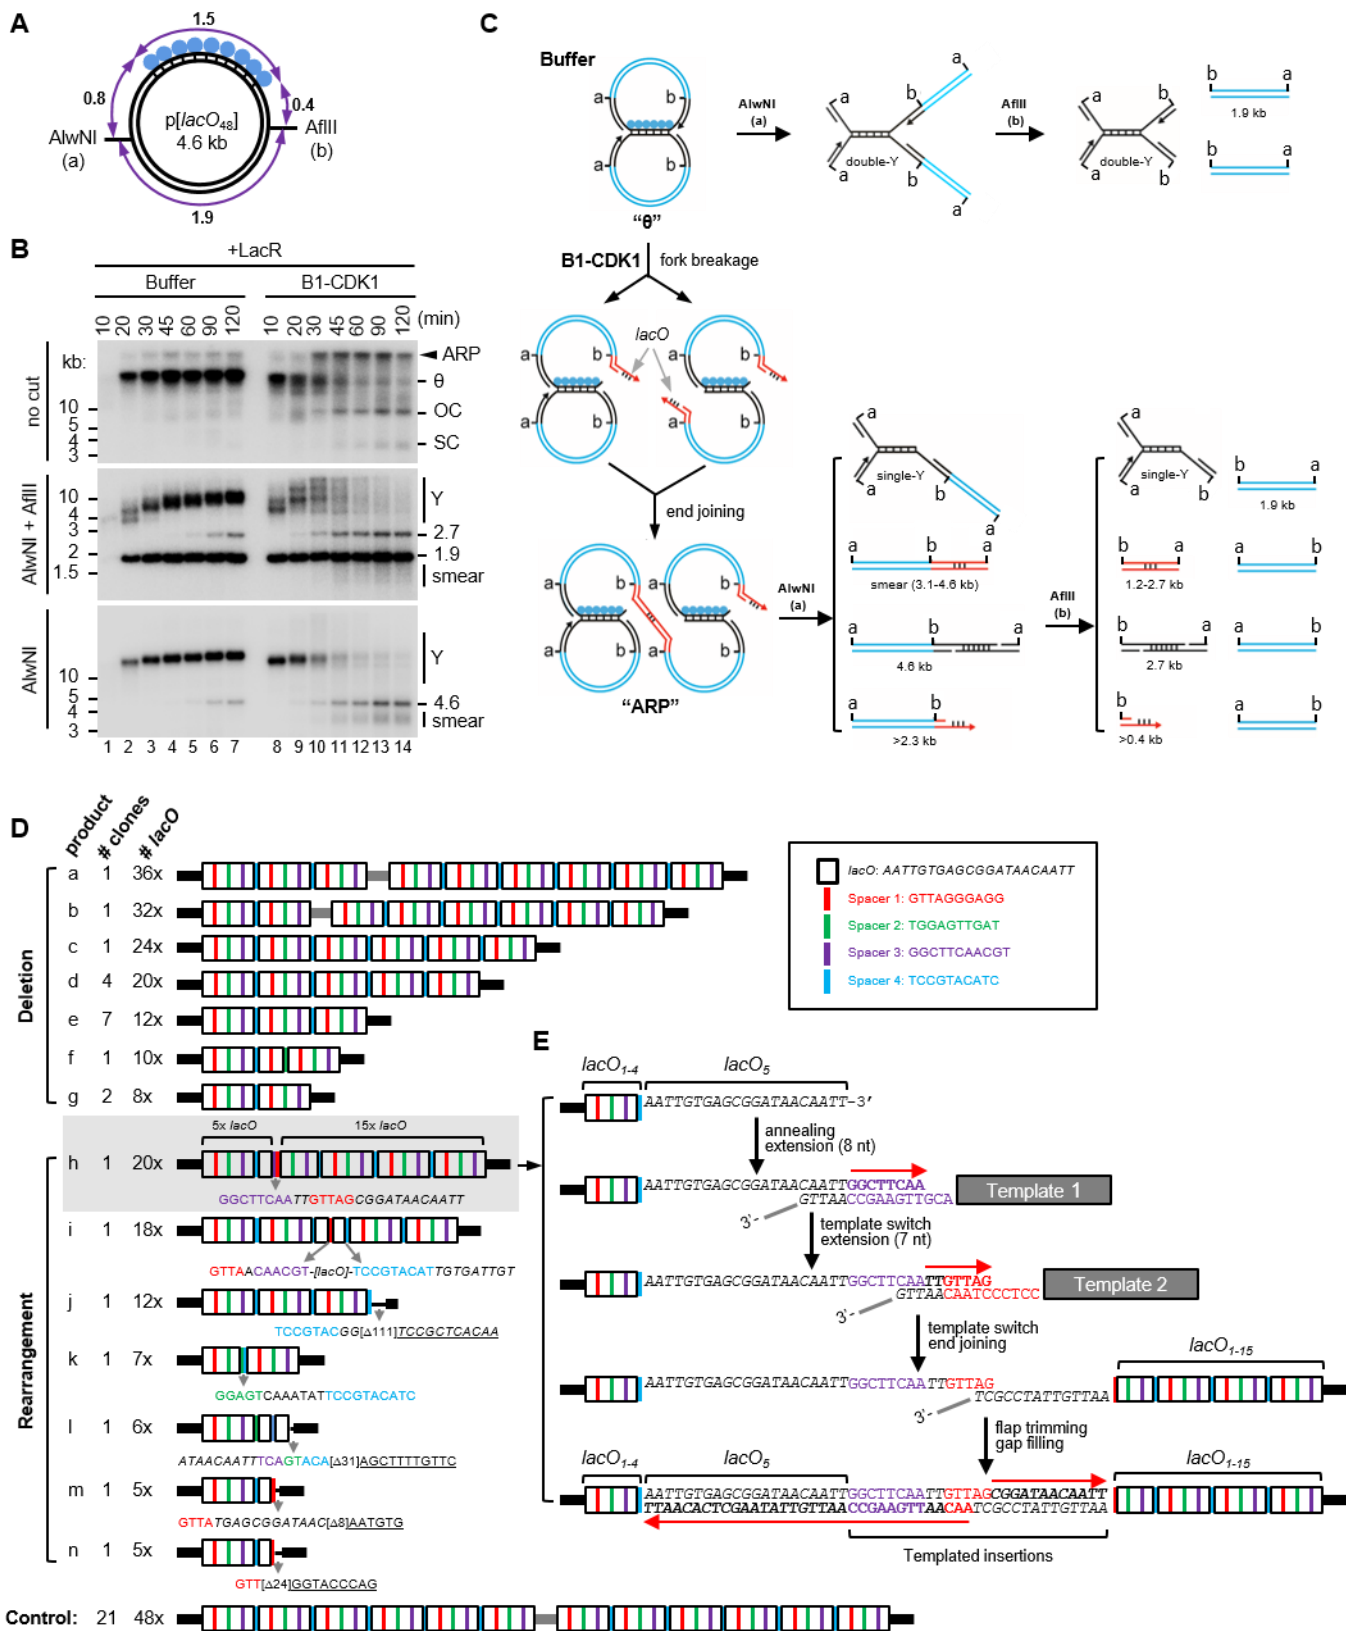

Figure 2

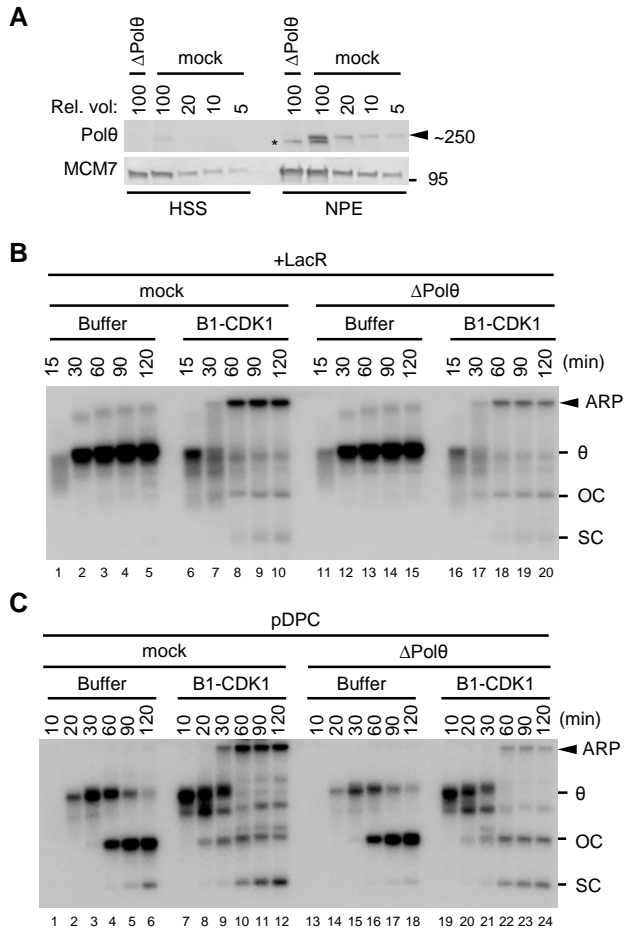

Figure 3



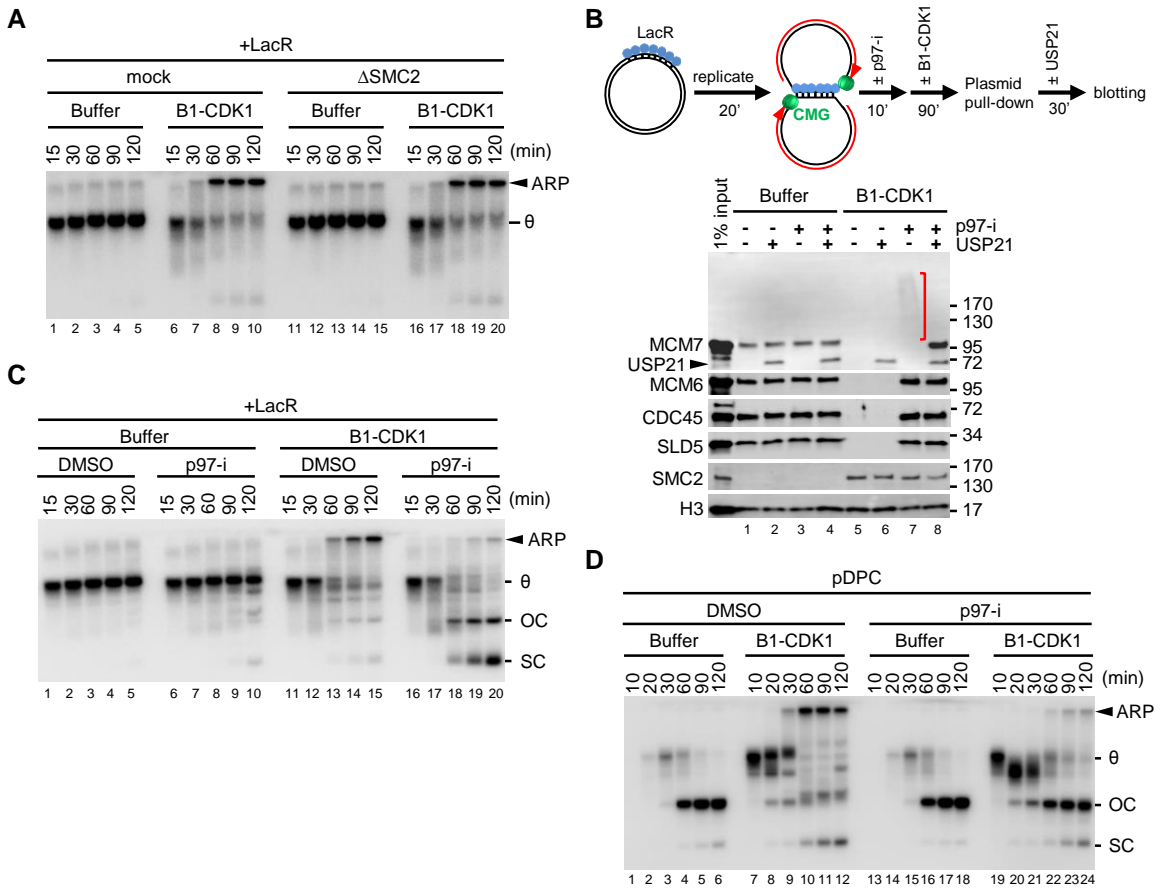

Figure 4

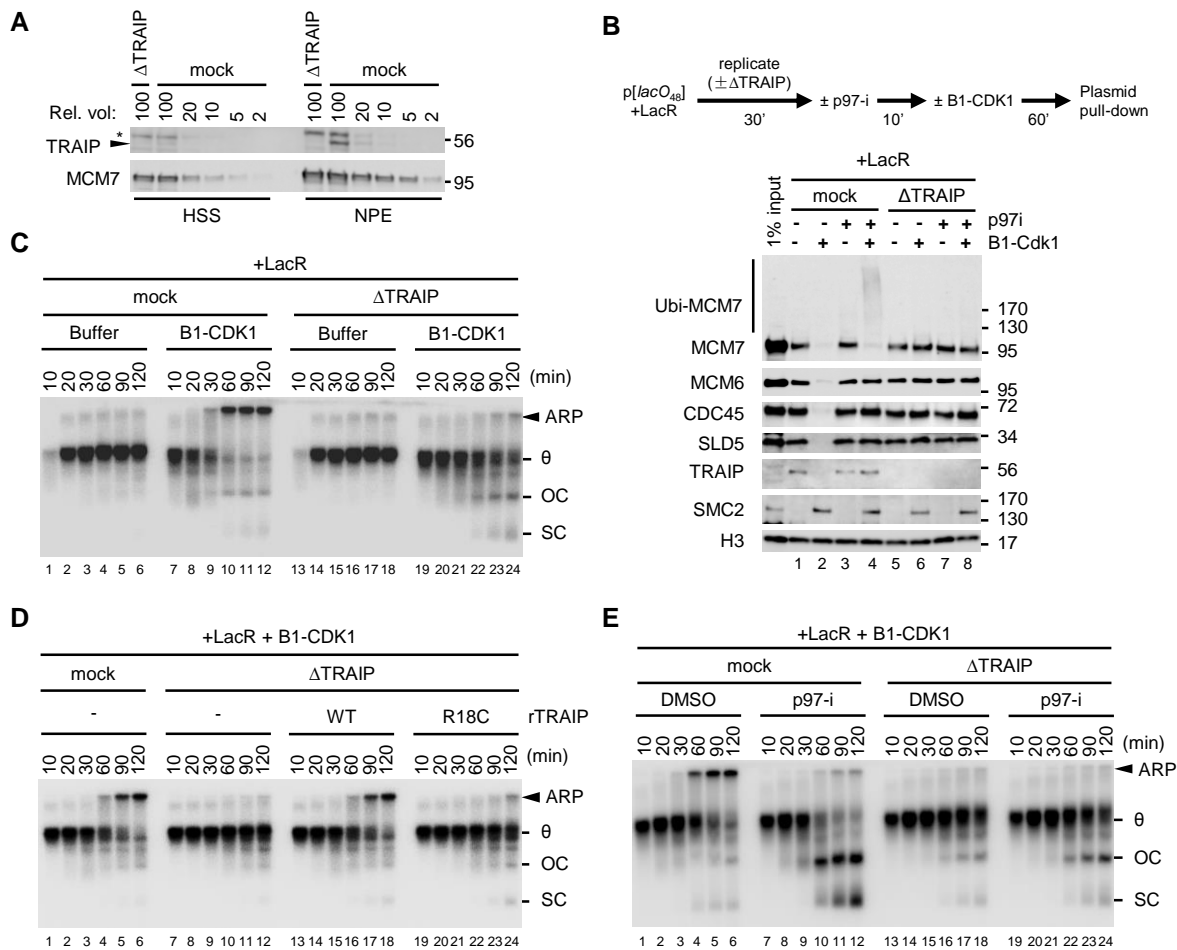

Figure 5

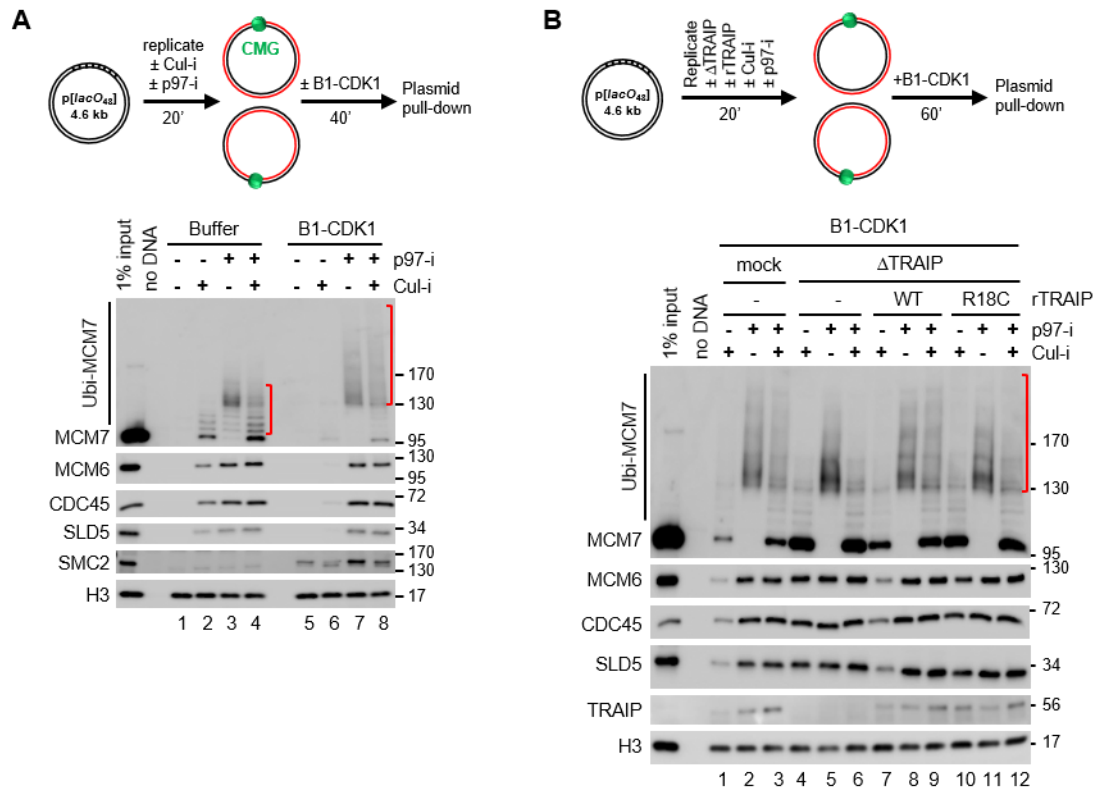

**Figure 6**

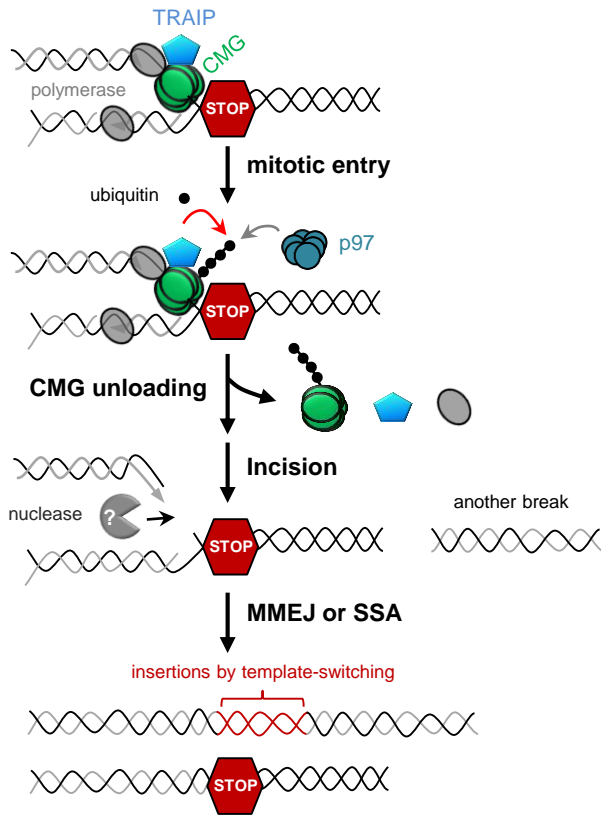

**Figure 7**

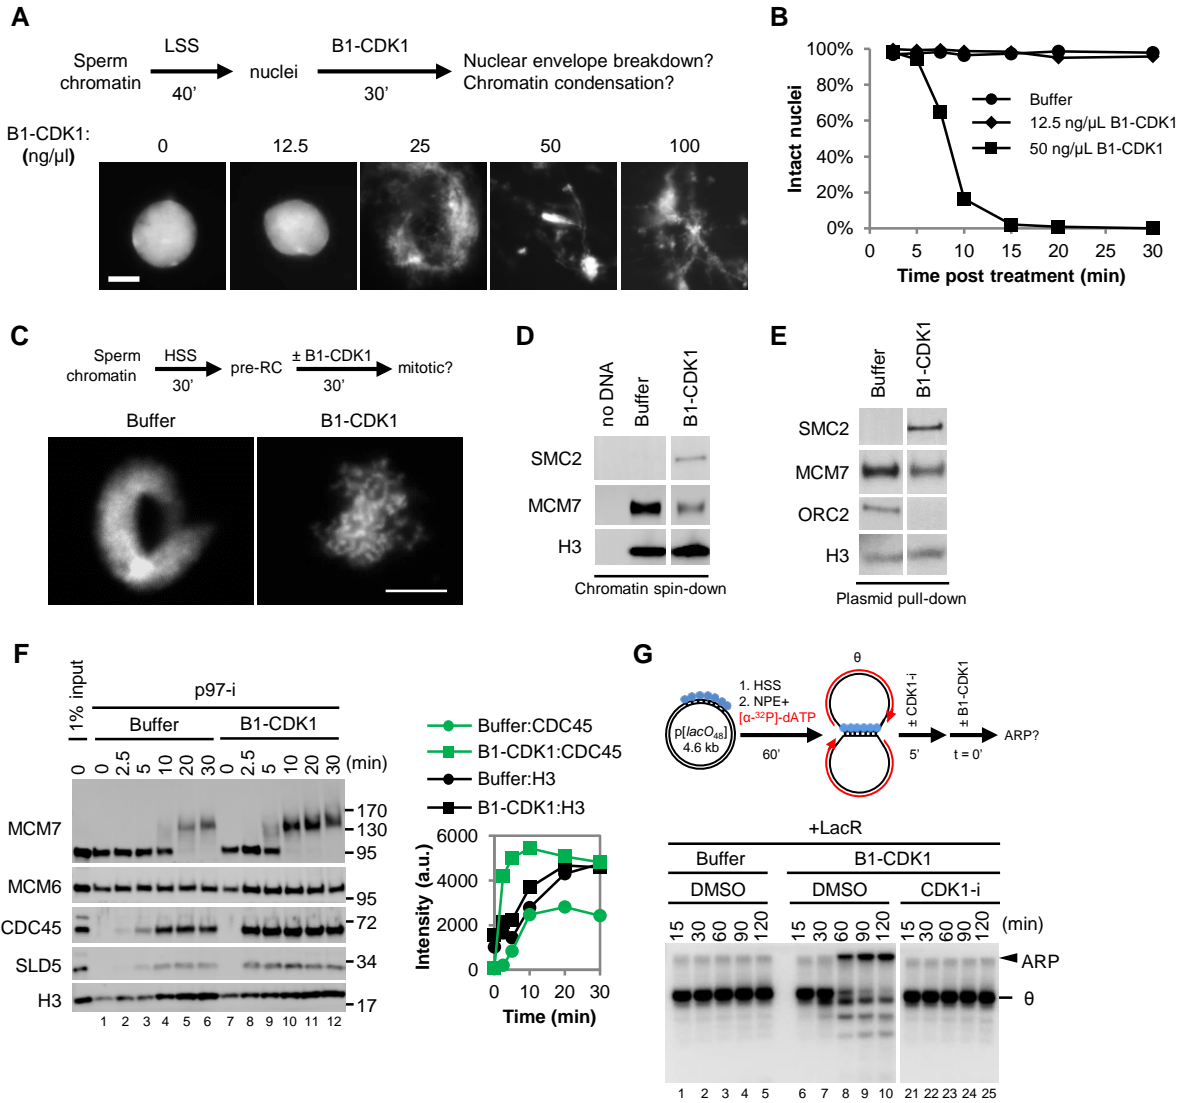

Figure S1

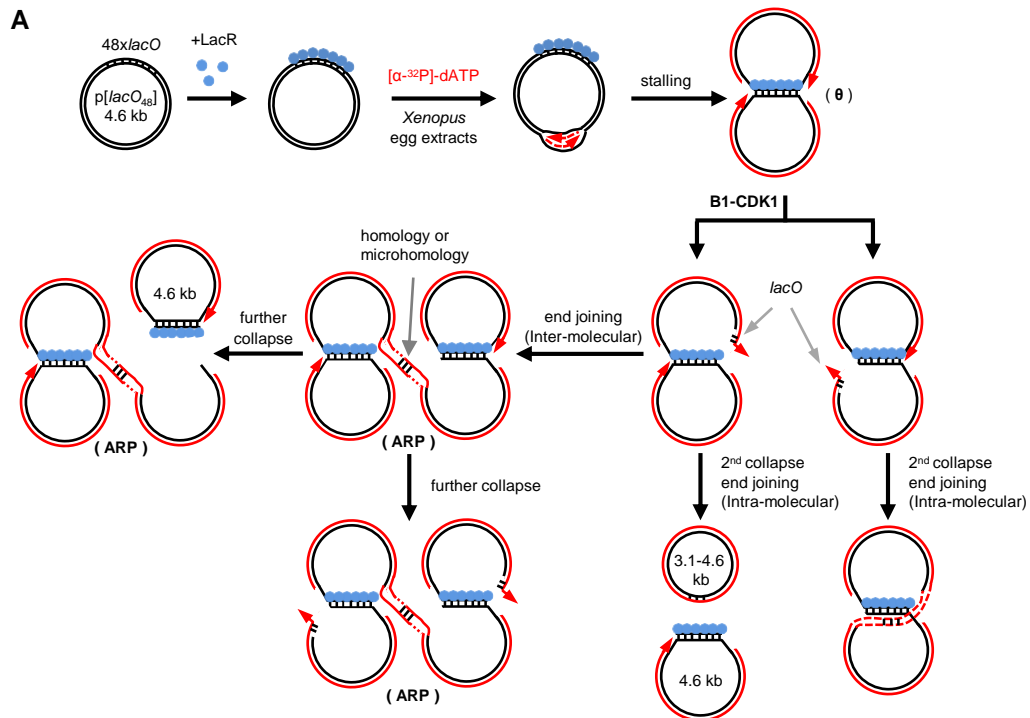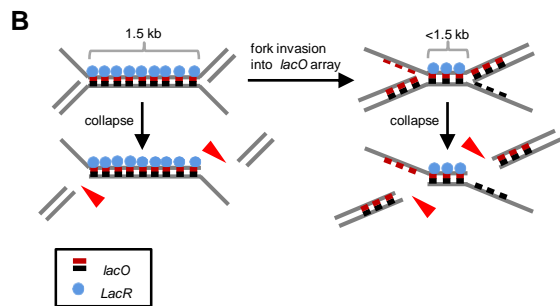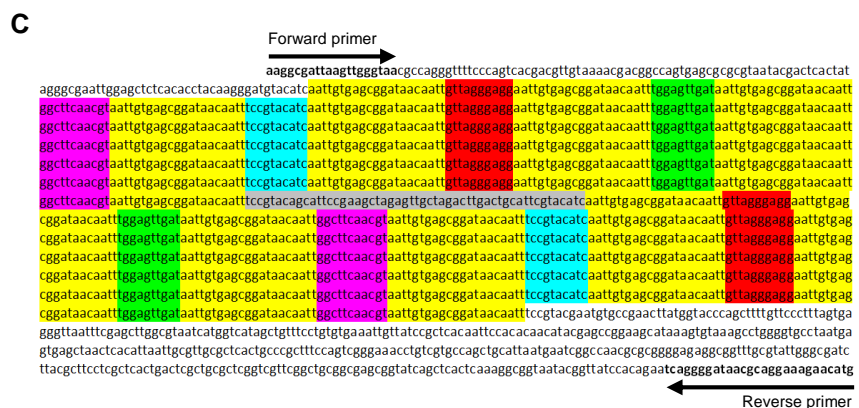

Figure S2

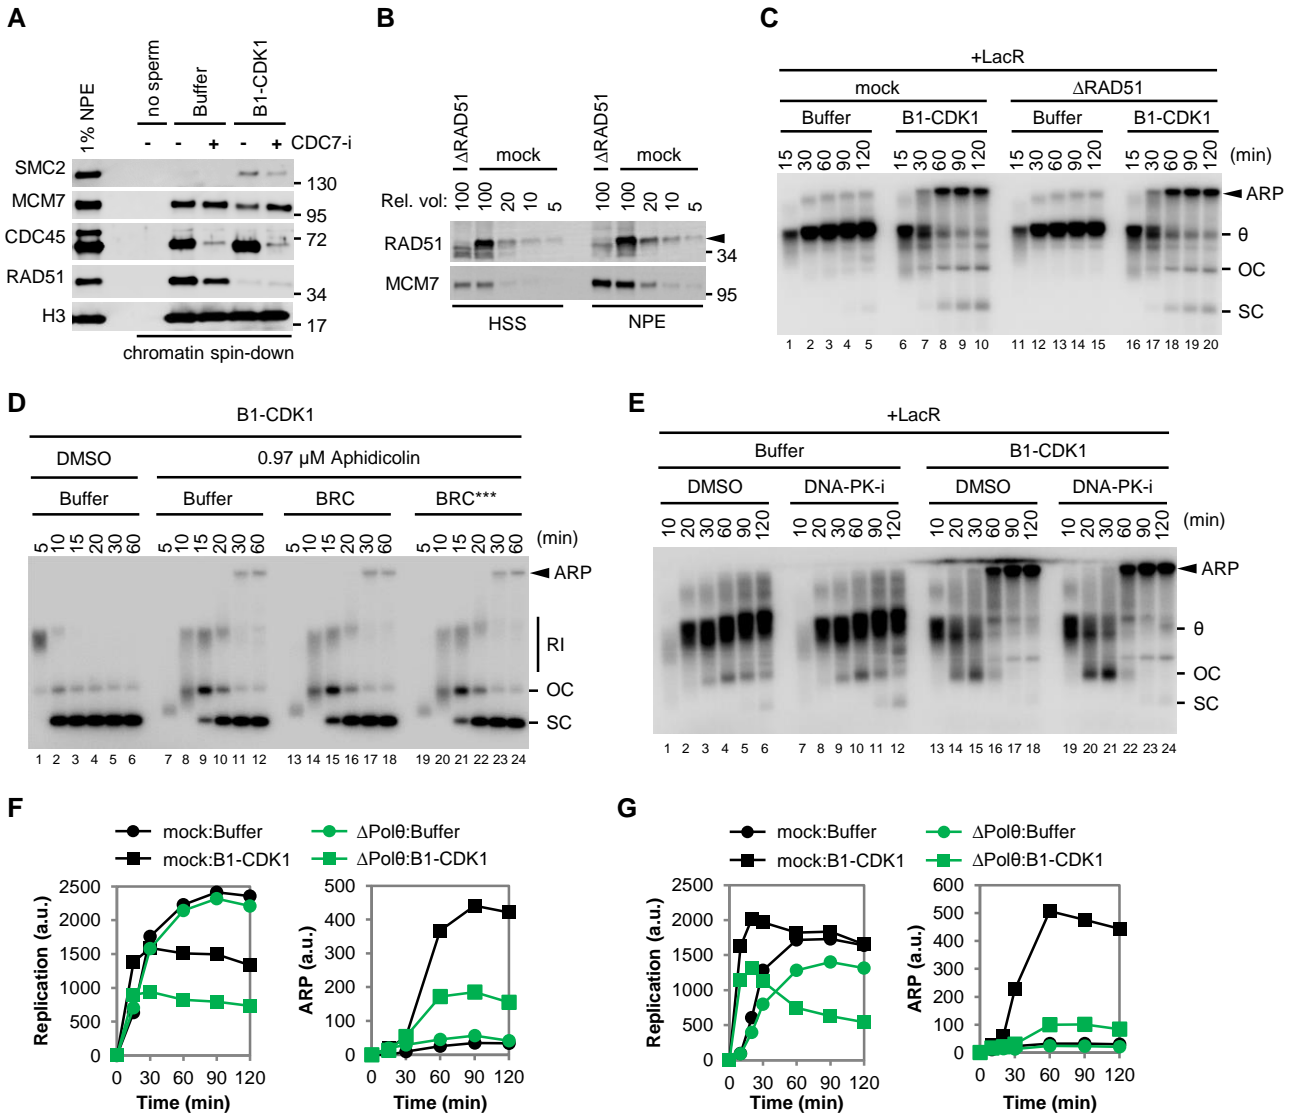

Figure S3

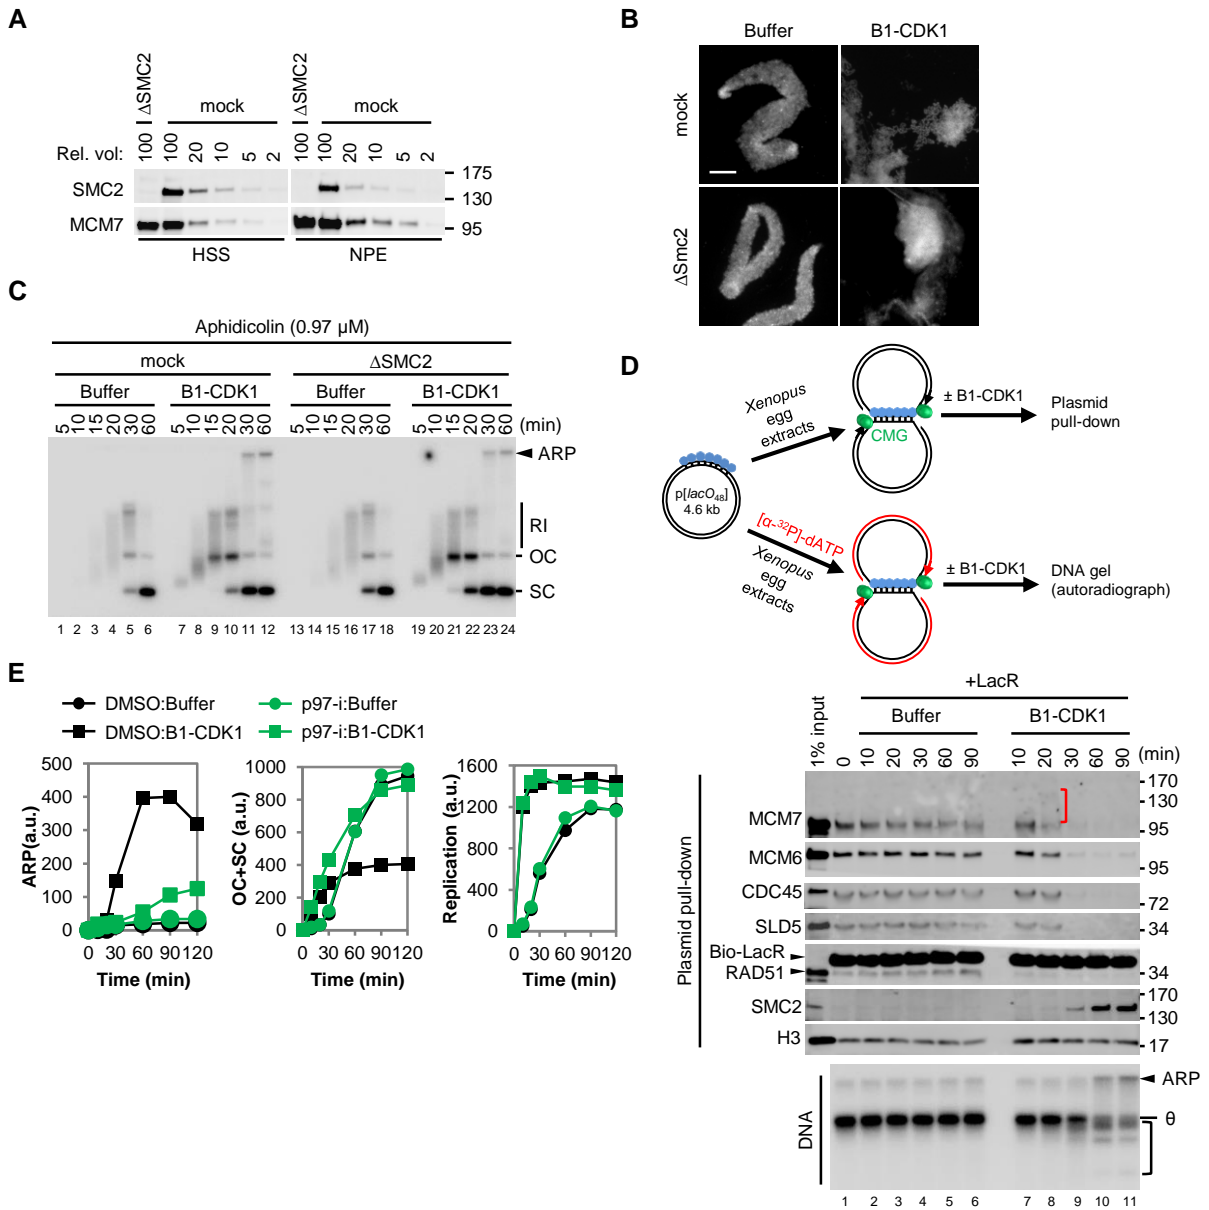

Figure S4



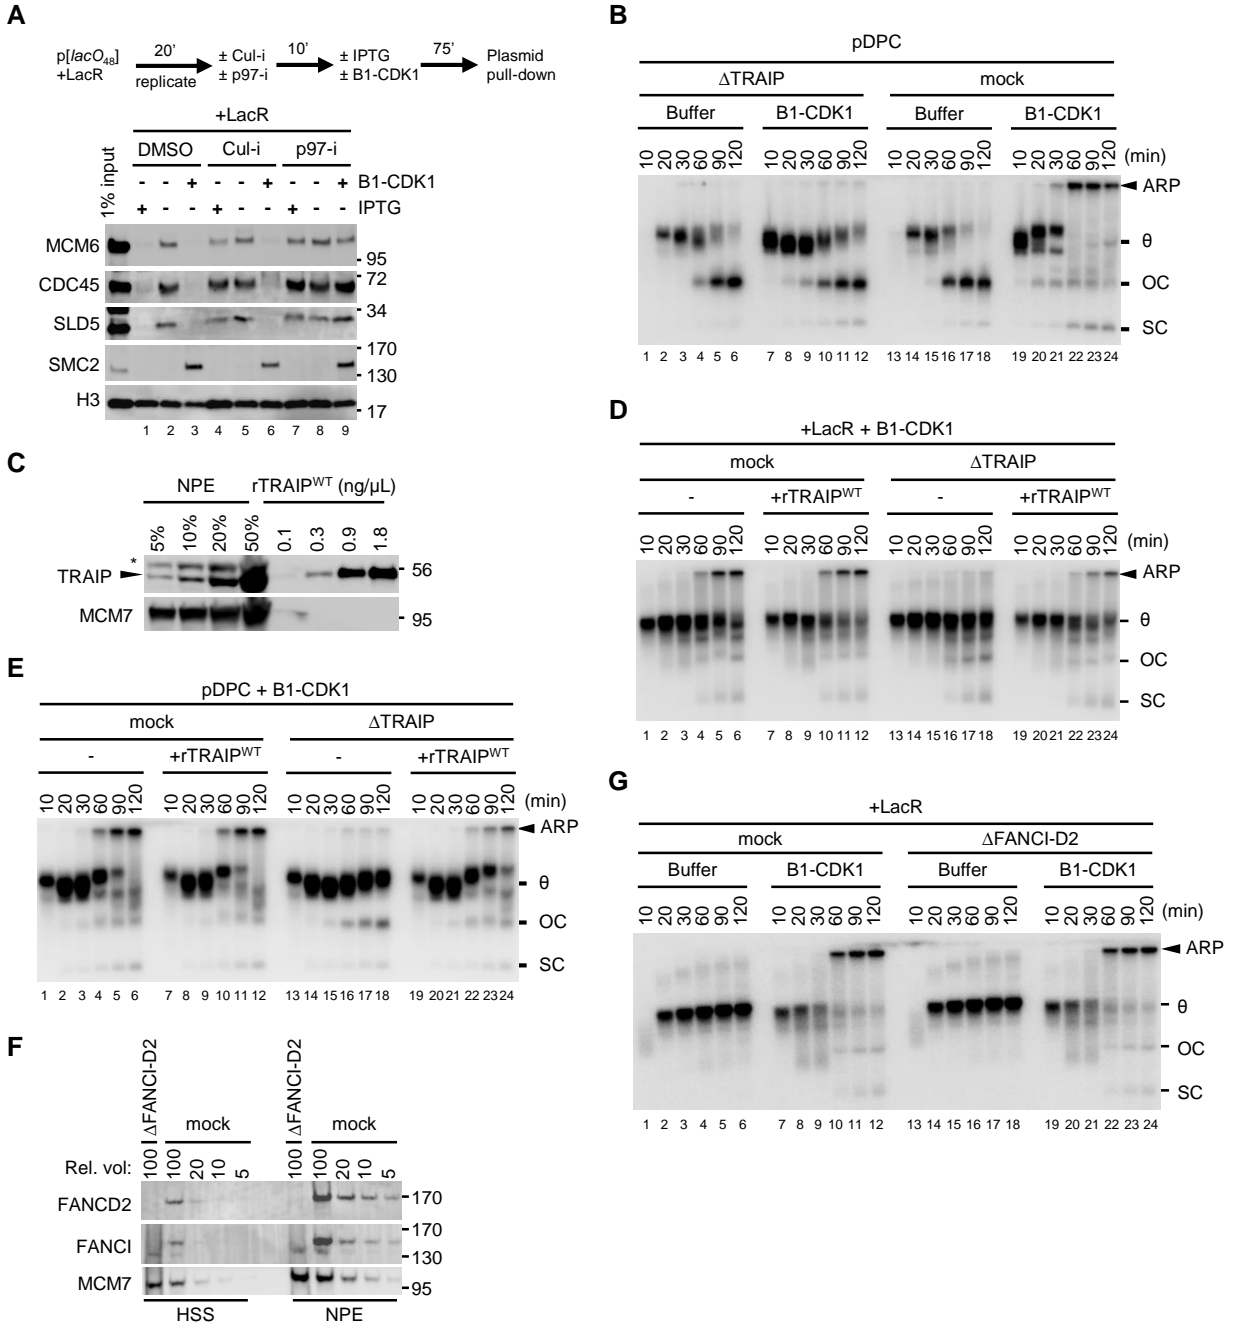

Figure S5

**A**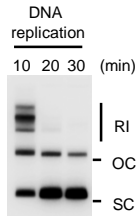**B**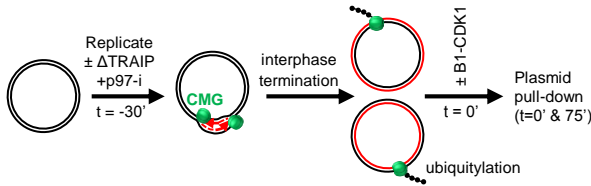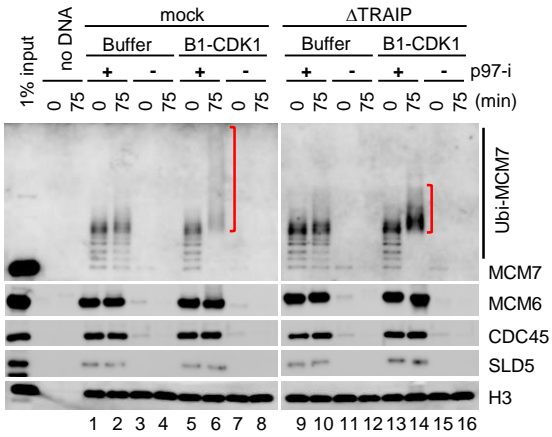**C**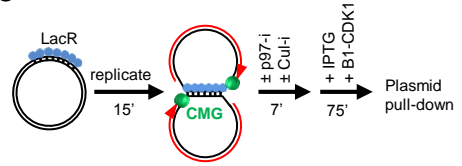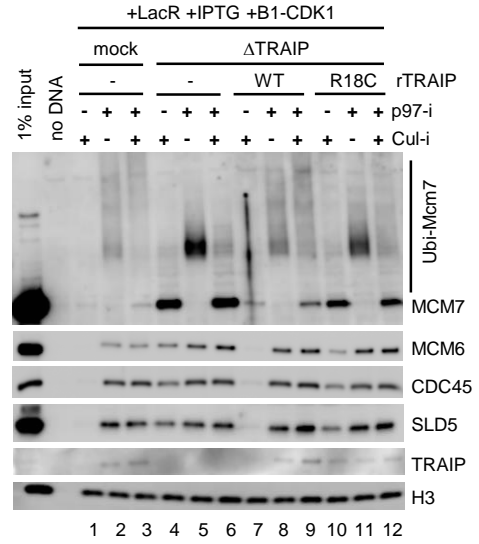**D**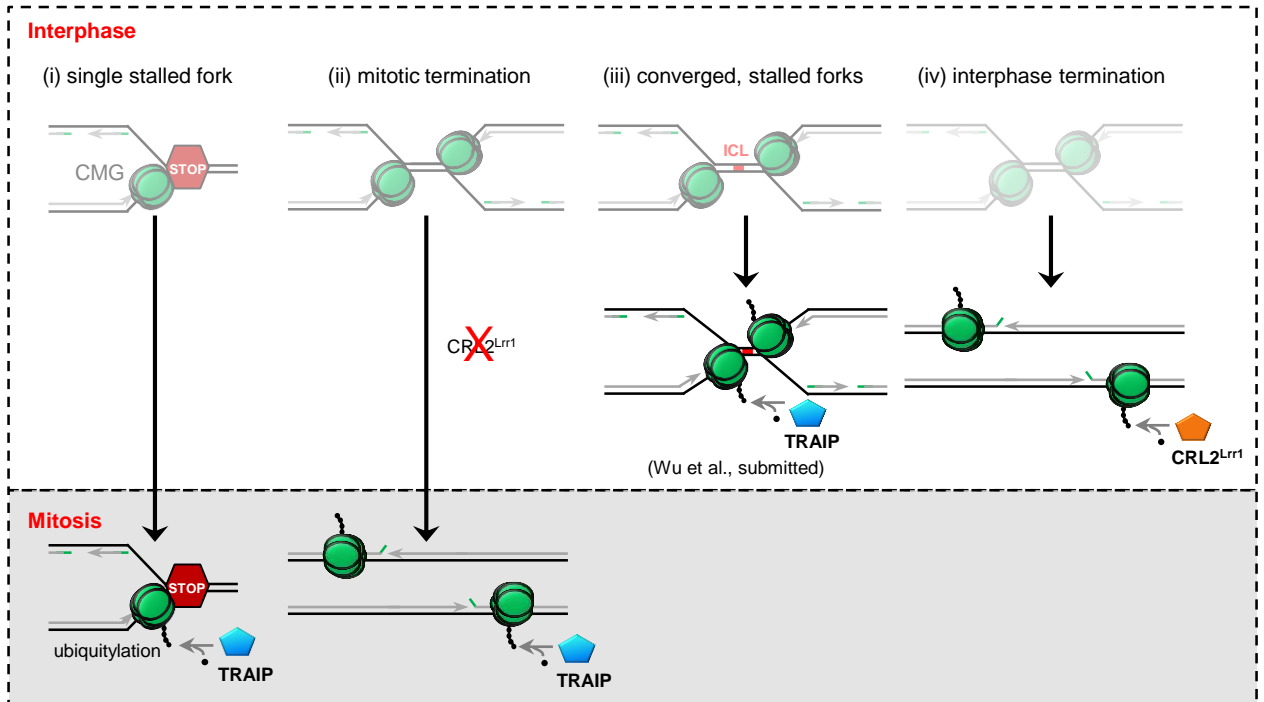**Figure S6**

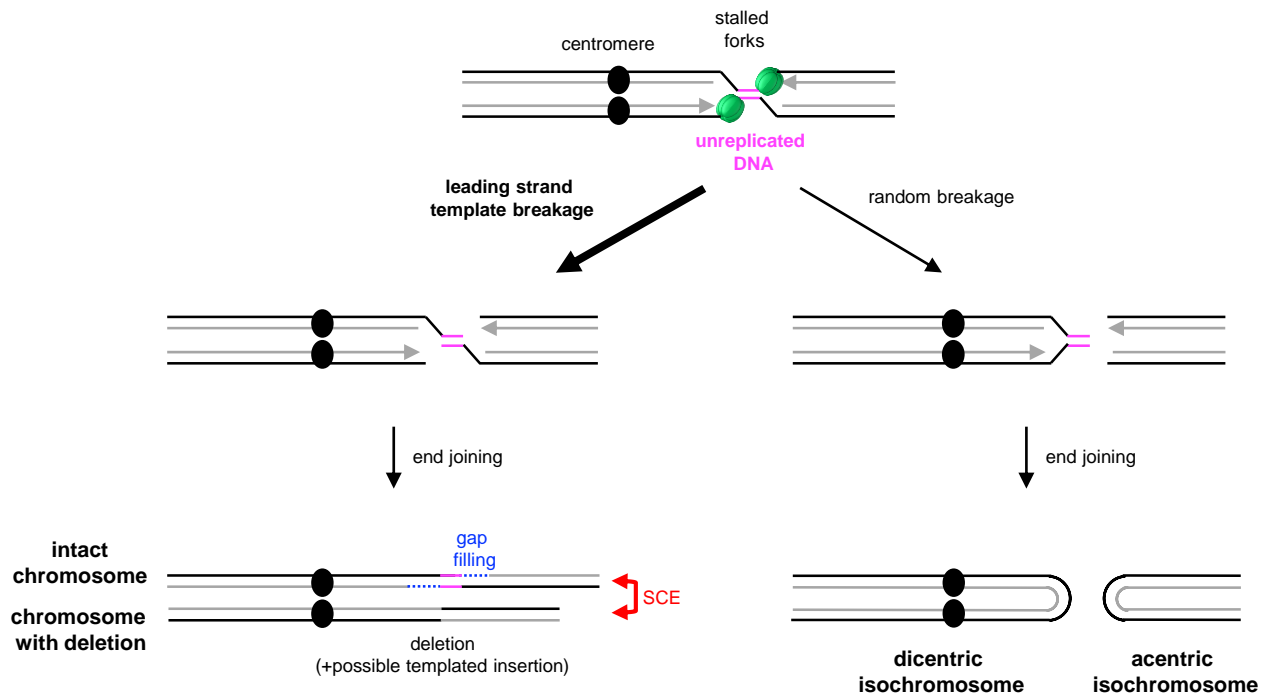

Figure S7
